# The Amyloid Clearance Defect in ApoE4 Astrocytes is Corrected by Epigenetic Restoration of NHE6

5

Hari Prasad and Rajini Rao\*

Department of Physiology, The Johns Hopkins University School of Medicine

725 N. Wolfe Street, Baltimore MD 21025

\*Correspondence, lead contact

10 Email: [rrao@jhmi.edu](mailto:rrao@jhmi.edu)

Phone: 410 955 4732

Twitter: @madamscientist

15

## Summary

The accumulation of amyloid protein A $\beta$  in senile plaques is a key driver and hallmark of Alzheimer disease (AD), a major cause of death and dementia in the elderly. The strongest genetic risk factor in sporadic AD is the  $\epsilon$ 4 allele of Apolipoprotein E (ApoE4), which potentiates pre-symptomatic endosomal dysfunction and defective clearance of A $\beta$ , although how these two pathways are linked has been unclear. Here, we show that aberrant accumulation of endosomal protons in ApoE4 astrocytes traps the LRP1 receptor in non-productive intracellular compartments, leading to loss of surface expression and A $\beta$  clearance. Hyperacidification of endosomal pH is caused by selective down regulation of the Na<sup>+</sup>/H<sup>+</sup> exchanger NHE6, which functions as a critical proton leak pathway, in ApoE4 brain and astrocytes. *In vivo*, the NHE6<sup>KO</sup> mouse model shows elevated A $\beta$  in the brain. Epigenetic restoration of NHE6 expression with histone deacetylase inhibitors normalized ApoE4-specific defects in endosomal pH, LRP1 trafficking and amyloid clearance. Thus, NHE6 is a prominent effector of ApoE4 and emerges as a promising therapeutic target in Alzheimer disease.

## Keywords

20

LOAD, amyloid, sodium hydrogen exchanger, histone deacetylase, ApoE4, endosome, trichostatin A, vorinostat

## Introduction

Alzheimer disease (AD) is a degenerative brain disorder and a leading cause of dementia that affects 47 million people worldwide <sup>1</sup>. AD is caused by pathological increase of amyloid  $\beta$  ( $A\beta$ ) in the brain, resulting from an imbalance between its production and clearance. Recent studies suggest that accumulation of  $A\beta$  in the brain begins at least 20 years before symptoms appear <sup>2</sup>. Although several promising drugs targeting the amyloid cascade have been developed, their astoundingly high failure rates (99.6%) in the clinic suggest that by the time amyloid plaques, neurofibrillary tangles and neuronal death are detected, it is unlikely that disease progression can be halted and reversed <sup>3</sup>. Identifying and targeting pre-clinical pathologies may be critical for an effective cure.

In this context, endosomal aberrations constitute the earliest detectable brain cytopathology, emerging before cognitive dysfunction is apparent in neurodegenerative disorders, including Alzheimer disease, Niemann-Pick Type C and Down syndrome <sup>4, 5, 6, 7</sup>. Consistent with this finding, genes associated with endosomal trafficking have been implicated as major risk factors in AD <sup>8</sup>. Importantly, prominent pre-symptomatic endosomopathy of the brain, evidenced by enlarged and more numerous endosomes, has been observed in the ApoE4 genotype <sup>9, 10, 11</sup>, the strongest known genetic risk factor influencing susceptibility to sporadic, late-onset AD (LOAD) <sup>12, 13</sup>. The pathological E4 variant of Apolipoprotein E is present in ~50% of patients with AD, and the presence of two copies of the E4 allele increases risk of LOAD by ~12-times as compared to E3 isoform <sup>14</sup>. Yet, despite strong evidence implicating endosomal uptake and clearance of  $A\beta$  in mediating AD risk in the ApoE4 genotype <sup>14, 15, 16</sup>, the underlying mechanism is unknown.

Here we show that a profound dysregulation of endosomal pH in humanized mouse ApoE4 astrocytes leads to intracellular sequestration and cell surface loss of the  $A\beta$  receptor, LRP1. Selective down regulation of the endosomal  $Na^+/H^+$  exchanger NHE6, which functions as a safety valve against excessive acidification by exchanging luminal protons with cations, is mediated by increased nuclear translocation of the

histone deacetylase HDAC4 in ApoE4 astrocytes. HDAC inhibitors that restore NHE6 expression also restore surface expression of LRP1 and effectively correct defective amyloid clearance in ApoE4 astrocytes to non-pathological ApoE3 levels. Consistent with a role in amyloid pathology, *in vivo* A $\beta$  levels were found to be significantly higher in the brains of NHE6<sup>KO</sup> mice. These findings could have implications for Christianson syndrome patients who have loss of function mutations in NHE6 and exhibit age-dependent hallmarks of neurodegeneration<sup>17, 18</sup>. In summary, we identify NHE6 as a novel ApoE effector and suggest potential therapeutic options in the treatment of amyloid disorders.

10

## Results

### ***ApoE4 astrocytes have cargo specific defects in endocytosis***

15 Studies in human, mouse models and cell-culture have revealed the importance of ApoE-isotype-specific differences in A $\beta$  uptake and clearance in AD pathogenesis, although the underlying mechanism remains to be determined<sup>14, 16, 19, 20</sup>. To this end, we developed a sensitive and quantitative fluorescent-based assay to monitor cell-associated A $\beta$  peptide (Fig. 1A) in astrocytes from ApoE<sup>KO</sup> mice with isogenic knock-in of human ApoE3 and ApoE4 variants<sup>14</sup>. Internalized A $\beta$  is sorted to the lysosomal degradation pathway as evidenced by high colocalization with late endosomal-lysosomal markers and low colocalization with the recycling compartment marker transferrin (TFN) (Fig. S1A-D). Strikingly, cell-associated A $\beta$  was reduced by 78% in ApoE4 astrocytes, relative to ApoE3 (Fig. 1B). To distinguish between A $\beta$  uptake and turnover, we monitored the time course of A $\beta$  internalization by flow cytometry analysis (Fig. 1C) and confocal microscopy (Fig. S1E). Consistent with defective uptake, there was significantly lower cell-associated A $\beta$  in ApoE4 cells relative to ApoE3 at all time points (Fig. 1C, Fig. S1F). In contrast, cell-associated TFN was 1.5-2 fold higher in ApoE4 cells relative to ApoE3 as measured by flow cytometry (Fig. 1D)

20

25

and confocal microscopy (Fig. 1E). Uptake of dextran by fluid-phase endocytosis was not different between ApoE genotypes (Fig. 1F). These observations reveal cargo selective effects of ApoE isotype in astrocytes and point to alterations in specific receptor pathways.

5

### ***Surface expression of LRP1 receptor is severely reduced in ApoE4 astrocytes***

Transcriptional down regulation of the LRP1 receptor has been suggested as an underlying mechanism for defective A $\beta$  clearance in AD patients<sup>21</sup>. However, we found  
10 no difference in brain LRP1 gene expression at different stages of AD (incipient, moderate, and severe), as compared with normal controls, in publicly available microarray data<sup>22</sup> (Fig. S2A-B). Meta-analysis of nine independent gene expression studies from anatomically and functionally distinct brain regions, comprising a total of 103 AD and 87 control post-mortem brains also showed no significant changes in LRP1  
15 gene expression in AD (Fig. S2C-D). Consistent with these findings, we observed no differences in LRP1 transcript and total protein expression between ApoE3 and ApoE4 astrocytes (Fig. S2E-G).

LRP1 undergoes constitutive endocytosis from the membrane and recycling back to the cell surface<sup>23</sup>. Therefore we considered the possibility that alterations in LRP1  
20 receptor recycling could result in differences in plasma membrane expression. ApoE isotype-specific surface expression of LRP1 was evaluated using four independent approaches (Fig. 2A). First, surface biotinylation revealed that plasma membrane expression of LRP1 receptor in ApoE4 astrocytes was lower by ~50% (Fig. 1B). Second, an antibody directed against an external epitope of LRP1 to quantify surface  
25 expression in live cells by flow cytometry analysis showed a reduction of LRP1-positive cells by ~43% (Fig. 1C). Third, this was confirmed by confocal microscopy showing ~49% lower LRP1 surface labeling by antibody in ApoE4 (Fig. 1D). In a fourth approach, surface-bound ligand (fluorescent A $\beta$ ) measured by confocal microscopy was 66% lower in ApoE4 astrocytes (Fig. 1E). Notably, the greater attenuation in A $\beta$  binding  
30 when compared to the ~50% reduction in surface LRP1 levels suggests additional

isotype-specific mechanisms that contribute to A $\beta$  clearance, such as reduced ligand-receptor affinity in ApoE4 cells or reductions in other A $\beta$  receptors. Thus, ApoE isotype-specific alterations in receptor recycling determine LRP1 surface expression and cellular A $\beta$  uptake, revealing a new pharmacological target for amyloid clearance defects in the pathological ApoE4 genotype.

### ***Endo-lysosomal pH is defective in ApoE4 astrocytes***

The pH within the endo-lysosomal system plays a critical role in receptor-mediated endocytosis and recycling<sup>24</sup>. We used compartment-specific, pH-sensitive fluorescence reporters to probe ApoE-isotype dependent differences in endosomal, lysosomal and cytoplasmic pH (Fig. 3A). Endosomal pH in ApoE4 astrocytes was strongly reduced by ~0.84 pH unit, relative ApoE3 (Fig. 3B). In contrast, we observed >1 pH unit elevation of lysosomal pH in ApoE4 astrocytes (Fig. 3C). Previously, elevated lysosomal pH was observed in presenilin 1 (PS1)-deficient cell culture models and neurons, another genetic model of AD<sup>25</sup>. Cytoplasmic pH showed no significant differences between the two ApoE isotypes (Fig. 3D).

To determine if there was a causal link between endo-lysosomal pH and defective A $\beta$  clearance in ApoE4 astrocytes, we treated ApoE4 cells with the ionophore monensin that mediates Na<sup>+</sup>/H<sup>+</sup> exchange across acidic compartments<sup>26</sup>. Thus, monensin treatment (50 $\mu$ M for 1 h) elevated endosomal pH in ApoE4 knock-in astrocytes from 5.38 $\pm$ 0.01 to 5.74 $\pm$ 0.03, relative to the vehicle treated control (Fig. 3E). Concomitantly, monensin treatment restored A $\beta$  clearance in ApoE4 astrocytes to ApoE3 levels, as shown by flow cytometry analysis (Fig. 3F). This was independently confirmed by confocal microscopy (Fig. 3G), suggesting that defective pH regulation could underlie the observed A $\beta$  clearance defects.

## ***NHE6 restores defective A $\beta$ clearance in ApoE4 astrocytes***

Luminal pH in the endo-lysosomal network is set by the precise balance of proton pump and leak pathways, mediated by V-type H<sup>+</sup>-ATPase and endosomal Na<sup>+</sup>/H<sup>+</sup> exchangers (NHE6), respectively (Fig. 4A)<sup>27, 28, 29, 30</sup>. Changes in expression and activity of the pump and leak pathways could lead to significant dysregulation of endosomal pH in Alzheimer brains. Consistent with this possibility, analysis of a publicly available microarray dataset (GSE5281) comprising a total of 15 sporadic, late-onset AD (LOAD) and 12 matched control post-mortem brains<sup>31</sup> revealed that genes involved in hydrogen ion transmembrane transport, including the endosomal NHE6 and V-ATPase subunits, comprised 10% of the top 100 down regulated genes, exhibiting highest enrichment scores (>15-fold; Fig. S3A). In AD patients with ApoE4/4 genotype, NHE6 was among the transcripts differentially down regulated in hippocampus, by up to ~4-fold compared to ApoE3/3<sup>32, 33</sup>. We validated these findings using an independent, large human brain transcriptome dataset ( $n=363$ , GSE15222) to show ApoE4 isotype-specific differential gene expression of NHE6 in aging brain<sup>34</sup> (Fig. 4B). Although NHE6 transcript was similar in ApoE<sup>KO</sup> mouse astrocytes and ApoE<sup>KO</sup> astrocytes with knock-in of human ApoE3, it was ~56% reduced in ApoE4 knock-in cells (Fig. 4C). There was also ApoE4 specific reduction in transcript for the related endosomal isoform NHE9 (~70% lower) and lysosomal V-ATPase V0a1 subunit (~67%), but not for the plasma membrane NHE1 isoform (Fig. S3B). These large transcript differences could account for the observed ApoE-isotype specific shifts in endo-lysosomal pH.

Taken together, these data suggest an important, hitherto underappreciated role of proton transport and endosomal pH regulation in AD. We hypothesized that NHE6 is a potential ApoE effector, and that down regulation of NHE6 in disease-associated ApoE4 variants is causal to a subset of AD phenotypes. Consistent with this hypothesis, amyloid A $\beta$  levels were found to be elevated in mouse brains from NHE6<sup>KO</sup> (Fig. 4C), together with diminished brain weight (Fig. S3C), suggesting an underlying neurodegenerative pathology.

Similar to monensin treatment, lentiviral vector mediated expression of NHE6 alkalized the endosomal lumen in ApoE4 astrocytes (Fig. S3D). Therefore, we tested if ectopic expression of GFP-tagged eNHE isoforms could correct defective A $\beta$  uptake in ApoE4 astrocytes. Remarkably, A $\beta$  clearance was restored to ApoE3 levels in ApoE4 astrocytes transfected with NHE6 (Fig. 4E), but not with NHE9 (Fig. S3E-F), pointing to an isoform-specific role for NHE6 in A $\beta$  clearance.

Colocalization of NHE6 with EEA1 and LRP1 (Fig. S3G-H) suggested a potential role for NHE6 in endosomal recycling of LRP1 receptors. Compared to the weak surface LRP1 staining in vector-transfected ApoE4 astrocytes, we observed prominent, ~2.5-fold higher LRP1 staining in ApoE4 cells expressing ectopic NHE6 (Fig. 4F). Similar results were obtained in surface biotinylation experiments that showed robust ~5.7-fold higher surface LRP1 levels in ApoE4 cells with restored NHE6 expression, compared to transfection with empty vector (Fig. S3I). We confirmed that there were no concomitant changes in LRP1 transcript (Fig. S3J) or total protein expression levels (Fig. S3I), suggesting that increased surface LRP1 was due to posttranslational redistribution of the existing cellular LRP1 pool. Taken together, our data point to diminished NHE6 expression as a major underlying cause for defective A $\beta$  clearance in ApoE4 astrocytes. Furthermore, since LRP1 is a receptor for multiple ligands, loss of NHE6 may contribute to other ApoE4 defects, including defective synaptosome uptake and synapse pruning<sup>12, 23</sup>.

### ***HDAC inhibitors rescue NHE6-mediated A $\beta$ clearance deficits***

Reports of increased nuclear translocation of multiple histone deacetylases (HDACs) in ApoE4 isotype, relative to ApoE3 (Fig. 5A), in post-mortem brains and neurons suggested a mechanistic basis for our observations<sup>35</sup>. Fractional colocalization of HDAC4 with DAPI revealed prominent overlap, consistent with increased nuclear translocation in ApoE4 astrocytes (Fig. 5B). This was independently verified in Western blots of nuclear fractions, which showed higher HDAC4 in ApoE4 astrocytes relative to ApoE3 (Fig. S4A).



To translate these observations, we screened a panel of nine HDAC inhibitors comprising several different chemical classes for their potential to augment the expression of NHE6 in ApoE4 astrocytes. Whereas inhibitors of class I (CI994) or class II (MC1568) HDACs resulted in minimal changes in NHE6 expression, broad-spectrum drugs inhibiting both classes, including sodium butyrate, sodium valproate, LBH589, TSA, and SAHA (vorinostat), resulted in significant restoration of NHE6 expression levels in ApoE4 astrocytes to levels comparable to ApoE3 astrocytes (Fig. 5C). Other narrow spectrum HDAC inhibitors studied here (tubacin and clioquinol) had no significant effect. Both TSA and SAHA elicited dose dependent NHE6 increases with half-maximal response ( $EC_{50}$ ) of  $6.50 \pm 0.36 \mu\text{M}$  and  $6.81 \pm 0.53 \mu\text{M}$  (Fig. S4B-C), respectively, comparable to their therapeutic plasma concentrations<sup>36</sup>. Neither TSA nor SAHA significantly altered NHE9 levels (Fig. S4D). We confirmed that both TSA and SAHA stimulated acetylation of histone H3 and H4 in ApoE4 astrocytes following 60 minute of treatment (Fig. S4E-F). Next, we sought to determine if enhanced NHE6 expression resulting from inhibition of histone deacetylases was physiologically effective in correcting hyperacidic endosomal pH in ApoE4 astrocytes. TSA treatment ( $5 \mu\text{M}$  for 12h) exhibited a compartment-specific effect of significantly elevating endosomal pH (Fig. 5D) without effect on lysosomal pH (Fig. 5E). Of note, TSA or SAHA treatment in ApoE4 astrocytes did not significantly affect cell viability measured using trypan blue exclusion (Fig. S4G).

Key to the potential efficacy of HDAC inhibitors in AD therapy is their ability to rescue  $A\beta$  clearance deficits in ApoE4 astrocytes. We observed a prominent linear relationship between  $A\beta$  clearance and the fold-change in NHE6 expression ( $R^2=0.7884$ ; Fig. 5F) elicited by the panel of nine HDAC inhibitors. HDAC inhibitors with lower induction of NHE6 expression (e.g. MC1568 and tubacin) conferred minimal changes in  $A\beta$  clearance. Notably, broad-spectrum HDAC inhibitors (e.g. TSA and SAHA) that significantly restored NHE6 expression also elicited proportionally complete correction of defective  $A\beta$  clearance in ApoE4 astrocytes to levels similar (up to 92.4%) to ApoE3 cells (Fig. 5F and S4H). ApoE4 cells treated with SAHA showed prominent, vesicular  $A\beta$  staining relative to vehicle control (Fig. 5G). Taken together, these findings

reveal differential effects of ApoE3 and ApoE4 genotypes on nucleo-cytoplasmic shuttling of the HDACs leading to a novel molecular mechanism, with clinical implication, for ApoE4 associated down regulation of NHE6 in post-mortem brain and astrocyte models.

5

## Discussion

The discovery of endosomal Na<sup>+</sup>/H<sup>+</sup> exchangers (eNHE) first in yeast, and soon after in plants, metazoans, and mammalian systems, established their evolutionarily conserved role as a leak pathway for protons in compartmental pH homeostasis, critical for cargo trafficking and vesicular transport<sup>27, 37, 38</sup>. Na<sup>+</sup>/H<sup>+</sup> exchangers are estimated to have exceptionally high transport rates of ~1,500 ions/s<sup>39</sup>, so that even small perturbations in expression result in dramatic changes in ionic milieu within the limited confines of the endosomal lumen. Genetic studies have linked eNHE to a host of neurodevelopmental and neurodegenerative disorders, including Christianson syndrome (CS) with symptoms of autism, intellectual disability and epilepsy, Parkinsons disease, multiple sclerosis and AD, although underlying mechanisms remain to be determined<sup>27</sup>.

One clue emerged from network analysis of 1697 genes in a late-onset AD dataset (Cases n=176, Controls=188), in which the endosomal Na<sup>+</sup>/H<sup>+</sup> exchanger NHE6 (*SLC9A6*) was identified as a top-five hub transcript in AD, with 202 network connections and a plethora of potential downstream effects<sup>34</sup>. More recent network analysis of the metastable subproteome associated with AD also converged on NHE6 as a major hub gene regulating protein trafficking and clearance mechanisms<sup>40</sup>. In addition to prominent neurodegeneration phenotypes in CS patients, female carriers have learning difficulties and behavioral issues, and some present with low Mini Mental Status Exam (MMSE) scores suggestive of early cognitive decline<sup>41</sup>. Interestingly, NHE6 was among the most highly down regulated genes (up to 6-fold) in elderly (70 years) brain, compared to adult (40 years)<sup>42</sup>. These observations point to a more

widespread role for NHE6 in neurodegenerative disorders and unexpectedly common pathological pathways between CS and Alzheimer disease.

Previously, we showed that NHE6 regulates trafficking and BACE1-mediated processing of amyloid precursor protein APP to limit production of amyloidogenic peptides<sup>43</sup>. In this study, we demonstrate a critical role for NHE6 in the uptake and clearance of soluble, secreted A $\beta$  in astrocytes. Using ApoE-isoform-expressing isogenic astrocytes that produce, lipidate, package, and secrete ApoE in a brain-relevant physiological fashion, we showed that the well-documented pathogenic deficiency of ApoE4 astrocytes to clear A $\beta$  is mediated by decreased expression of NHE6, which results in endosomal over-acidification and reduced surface levels of the A $\beta$  receptor LRP1. Thus, NHE6 is a novel and important ApoE4 effector in astrocytes (Fig. 6). The precise pH-mediated perturbation in trafficking remains to be determined. It is likely that hyper-acidification of early and recycling endosomes redistributes plasma membrane proteins to the lysosome at the expense of recycling to the cell surface. Taken together, we propose that loss of NHE6 function contributes to the endosomal pathology observed in pre-symptomatic AD brains both by accelerating A $\beta$  production and by inhibiting A $\beta$  clearance, promoting the development of amyloid plaques and culminating in neurodegeneration and dementia.

Abnormalities in histone acetylation have been linked to several neurodegenerative diseases including AD, and HDAC inhibitors appear to show a neuroprotective effect, improving memory and cognition in mouse models<sup>44, 45</sup>. Here, we link increased nuclear translocation of HDAC4 in ApoE4 astrocytes to down regulation of NHE6 expression. We show that broad-spectrum HDAC inhibitors restore NHE6 expression, normalize endosomal pH and correct A $\beta$  clearance defects in ApoE4 astrocytes. Thus, the amelioration of AD pathogenesis observed *in vitro* and *in vivo* by small molecule inhibitors of HDACs may be mediated, in part, by NHE6. Future work could test the efficacy of these pharmacological agents on amyloid pathology in well-defined animal models. Given the well-known link between NHE6 dysfunction and epilepsy<sup>27, 46</sup>, we suggest that increased NHE6 expression could potentially contribute to anti-epileptic mechanisms of HDAC inhibitor drug sodium valproate. Importantly, our

data demonstrate a hitherto unrecognized ability of HDAC inhibitors to specifically enhance endosomal pH that could potentially correct human pathologies resulting from aberrant endosomal hyperacidification.

Dysfunction in endo-lysosomal pH is an emerging theme in AD with clear potential for intervention to exploit the disease-modifying effects of endosomal pH <sup>7</sup>. Amphoteric drugs such as bepridil and amiodarone partition into acidic compartments, alkalinize endosomes, and correct A $\beta$  pathology in cell culture and animal models <sup>47</sup>. Our study supports a rational, mechanistic basis for such repurposing of existing FDA-approved drugs with well-established safety and pharmacokinetic profiles, known to have off-label activity of endosomal alkalization, to target the cellular microenvironment in AD. Similar to our observations in AD, down regulation of NHE6 gene expression has been reported in autism brains <sup>48</sup>. We suggest that endosomal pH may be a critical mechanistic link between neurodevelopmental and neurodegenerative disorders. Thus, a subset of autism patients with dysregulated NHE6 activity, either from loss-of-function mutations or by down-regulated gene expression, are likely to have a high risk of developing neurodegenerative disorders, thereby providing a rational basis to stratify patients for targeted therapies. In conclusion, this work presents, (i) a novel ApoE4 regulated cellular mechanism and druggable target in AD, namely, regulation of amyloid pathology by intra-endosomal pH; (ii) a new focus on endosome trafficking in astrocyte function, a neglected area in neurodegenerative disorders; (iii) a new link between an autism gene and the AD risk allele ApoE4; (iv) a new strategy for mechanism-based therapies for AD and related devastating disorders with important implications for early intervention to limit progressive, severe and debilitating neurodegeneration seen in Christianson syndrome patients.

25

## Author Contributions

H.P. designed, conducted and analyzed experiments and wrote the paper. R.R. designed and interpreted experiments and wrote the paper.

## 5 Acknowledgements

We thank Drs. Robert Edwards and Julie Ullman of University of California San Francisco for providing mouse brains and Dr. David M Holtzman, Washington University, St. Louis for the gift of ApoE immortalized astrocytes. We are very grateful to Dr. Seth S. Margolis for helpful discussions, and Richard L. Blosser for assistance with the flow cytometry analysis. This work was made possible by support from the Johns Hopkins Medicine Discovery Fund to R.R. Additional support came from a grant to R.R. from the National Institutes of Health (DK054214). H.P. is Fulbright Fellow supported by the International Fulbright Science and Technology Award.

## References

1. Prince M, Wimo A, Guerchet M, Ali G, Wu Y, Prina M. World Alzheimer Report 2015. The global impact of dementia. An analysis of prevalence, incidence, cost & trends; Alzheimer's Disease International: London. (2015).
- 5 2. Villemagne VL, *et al.* Amyloid beta deposition, neurodegeneration, and cognitive decline in sporadic Alzheimer's disease: a prospective cohort study. *Lancet Neurol* **12**, 357-367 (2013).
- 10 3. Cummings JL, Morstorf T, Zhong K. Alzheimer's disease drug-development pipeline: few candidates, frequent failures. *Alzheimers Res Ther* **6**, 37 (2014).
4. Troncoso JC, *et al.* Neuropathology of preclinical and clinical late-onset Alzheimer's disease. *Ann Neurol* **43**, 673-676 (1998).
- 15 5. Nixon RA. Endosome function and dysfunction in Alzheimer's disease and other neurodegenerative diseases. *Neurobiol Aging* **26**, 373-382 (2005).
- 20 6. Cataldo AM, *et al.* Abeta localization in abnormal endosomes: association with earliest Abeta elevations in AD and Down syndrome. *Neurobiology of aging* **25**, 1263-1272 (2004).
7. Nixon RA. Amyloid precursor protein and endosomal-lysosomal dysfunction in Alzheimer's disease: inseparable partners in a multifactorial disease. *FASEB J* **31**, 2729-2743 (2017).
- 25 8. Karch CM, Goate AM. Alzheimer's disease risk genes and mechanisms of disease pathogenesis. *Biol Psychiatry* **77**, 43-51 (2015).
9. Cataldo AM, Peterhoff CM, Troncoso JC, Gomez-Isla T, Hyman BT, Nixon RA. Endocytic pathway abnormalities precede amyloid beta deposition in sporadic Alzheimer's disease and Down syndrome: differential effects of APOE genotype and presenilin mutations. *Am J Pathol* **157**, 277-286 (2000).
- 30 10. Cataldo A, *et al.* Endocytic disturbances distinguish among subtypes of Alzheimer's disease and related disorders. *Annals of neurology* **50**, 661-665 (2001).
- 35 11. Cataldo AM, Barnett JL, Pieroni C, Nixon RA. Increased neuronal endocytosis and protease delivery to early endosomes in sporadic Alzheimer's disease: neuropathologic evidence for a mechanism of increased beta-amyloidogenesis. *The Journal of neuroscience : the official journal of the Society for Neuroscience* **17**, 6142-6151 (1997).
- 40

12. Chung WS, *et al.* Novel allele-dependent role for APOE in controlling the rate of synapse pruning by astrocytes. *Proc Natl Acad Sci U S A* **113**, 10186-10191 (2016).
- 5 13. Yu JT, Tan L, Hardy J. Apolipoprotein E in Alzheimer's disease: an update. *Annu Rev Neurosci* **37**, 79-100 (2014).
14. Verghese PB, *et al.* ApoE influences amyloid-beta (Abeta) clearance despite minimal apoE/Abeta association in physiological conditions. *Proc Natl Acad Sci U S A* **110**, E1807-1816 (2013).
- 10 15. Kanekiyo T, Xu H, Bu G. ApoE and Abeta in Alzheimer's disease: accidental encounters or partners? *Neuron* **81**, 740-754 (2014).
16. Liu CC, *et al.* ApoE4 Accelerates Early Seeding of Amyloid Pathology. *Neuron* **96**, 1024-1032 e1023 (2017).
- 15 17. Garbern JY, *et al.* A mutation affecting the sodium/proton exchanger, SLC9A6, causes mental retardation with tau deposition. *Brain* **133**, 1391-1402 (2010).
- 20 18. Xu M, *et al.* Mixed neurodevelopmental and neurodegenerative pathology in *Nhe6*-null mouse model of Christianson syndrome. *eNeuro*, (2017).
19. Mawuenyega KG, *et al.* Decreased clearance of CNS beta-amyloid in Alzheimer's disease. *Science* **330**, 1774 (2010).
- 25 20. Castellano JM, *et al.* Human apoE isoforms differentially regulate brain amyloid-beta peptide clearance. *Sci Transl Med* **3**, 89ra57 (2011).
- 30 21. Kang DE, *et al.* Modulation of amyloid beta-protein clearance and Alzheimer's disease susceptibility by the LDL receptor-related protein pathway. *The Journal of clinical investigation* **106**, 1159-1166 (2000).
- 35 22. Blalock EM, Geddes JW, Chen KC, Porter NM, Markesbery WR, Landfield PW. Incipient Alzheimer's disease: microarray correlation analyses reveal major transcriptional and tumor suppressor responses. *Proc Natl Acad Sci U S A* **101**, 2173-2178 (2004).
23. Lillis AP, Mikhailenko I, Strickland DK. Beyond endocytosis: LRP function in cell migration, proliferation and vascular permeability. *J Thromb Haemost* **3**, 1884-1893 (2005).
- 40 24. Casey JR, Grinstein S, Orlowski J. Sensors and regulators of intracellular pH. *Nat Rev Mol Cell Biol* **11**, 50-61 (2010).

25. Lee JH, *et al.* Lysosomal proteolysis and autophagy require presenilin 1 and are disrupted by Alzheimer-related PS1 mutations. *Cell* **141**, 1146-1158 (2010).
- 5 26. Muro S, Mateescu M, Gajewski C, Robinson M, Muzykantov VR, Koval M. Control of intracellular trafficking of ICAM-1-targeted nanocarriers by endothelial Na<sup>+</sup>/H<sup>+</sup> exchanger proteins. *Am J Physiol Lung Cell Mol Physiol* **290**, L809-817 (2006).
- 10 27. Kondapalli KC, Prasad H, Rao R. An inside job: how endosomal Na<sup>(+)</sup>/H<sup>(+)</sup> exchangers link to autism and neurological disease. *Front Cell Neurosci* **8**, 172 (2014).
28. Kondapalli KC, Hack A, Schushan M, Landau M, Ben-Tal N, Rao R. Functional evaluation of autism-associated mutations in NHE9. *Nat Commun* **4**, 2510 (2013).
- 15 29. Kondapalli KC, *et al.* A leak pathway for luminal protons in endosomes drives oncogenic signalling in glioblastoma. *Nature communications* **6**, 6289 (2015).
30. Ouyang Q, *et al.* Christianson syndrome protein NHE6 modulates TrkB endosomal signaling required for neuronal circuit development. *Neuron* **80**, 97-112 (2013).
- 20 31. Liang WS, *et al.* Gene expression profiles in anatomically and functionally distinct regions of the normal aged human brain. *Physiol Genomics* **28**, 311-322 (2007).
32. Xu PT, *et al.* Differences in apolipoprotein E3/3 and E4/4 allele-specific gene expression in hippocampus in Alzheimer disease. *Neurobiol Dis* **21**, 256-275 (2006).
- 25 33. Xu PT, *et al.* A SAGE study of apolipoprotein E3/3, E3/4 and E4/4 allele-specific gene expression in hippocampus in Alzheimer disease. *Mol Cell Neurosci* **36**, 313-331 (2007).
- 30 34. Webster JA, *et al.* Genetic control of human brain transcript expression in Alzheimer disease. *Am J Hum Genet* **84**, 445-458 (2009).
- 35 35. Sen A, Nelson TJ, Alkon DL. ApoE4 and Abeta Oligomers Reduce BDNF Expression via HDAC Nuclear Translocation. *J Neurosci* **35**, 7538-7551 (2015).
36. Alam MS, Getz M, Haldar K. Chronic administration of an HDAC inhibitor treats both neurological and systemic Niemann-Pick type C disease in a mouse model. *Sci Transl Med* **8**, 326ra323 (2016).
- 40 37. Brett CL, Donowitz M, Rao R. Evolutionary origins of eukaryotic sodium/proton exchangers. *Am J Physiol Cell Physiol* **288**, C223-239 (2005).



38. Fuster DG, Alexander RT. Traditional and emerging roles for the SLC9 Na<sup>+</sup>/H<sup>+</sup> exchangers. *Pflugers Arch* **466**, 61-76 (2014).
- 5 39. Lee C, *et al.* A two-domain elevator mechanism for sodium/proton antiport. *Nature* **501**, 573-577 (2013).
40. Kundra R, Ciryam P, Morimoto RI, Dobson CM, Vendruscolo M. Protein homeostasis of a metastable subproteome associated with Alzheimer's disease. *Proc Natl Acad Sci U S A* **114**, E5703-E5711 (2017).
- 10 41. Sinajon P, Verbaan D, So J. The expanding phenotypic spectrum of female SLC9A6 mutation carriers: a case series and review of the literature. *Hum Genet* **135**, 841-850 (2016).
- 15 42. Naumova OY, *et al.* Age-related changes of gene expression in the neocortex: preliminary data on RNA-Seq of the transcriptome in three functionally distinct cortical areas. *Dev Psychopathol* **24**, 1427-1442 (2012).
- 20 43. Prasad H, Rao R. The Na<sup>+</sup>/H<sup>+</sup> exchanger NHE6 modulates endosomal pH to control processing of amyloid precursor protein in a cell culture model of Alzheimer disease. *J Biol Chem* **290**, 5311-5327 (2015).
44. Xu K, Dai XL, Huang HC, Jiang ZF. Targeting HDACs: a promising therapy for Alzheimer's disease. *Oxid Med Cell Longev* **2011**, 143269 (2011).
- 25 45. Graff J, *et al.* An epigenetic blockade of cognitive functions in the neurodegenerating brain. *Nature* **483**, 222-226 (2012).
- 30 46. Zanni G, *et al.* A novel mutation in the endosomal Na<sup>+</sup>/H<sup>+</sup> exchanger NHE6 (SLC9A6) causes Christianson syndrome with electrical status epilepticus during slow-wave sleep (ESES). *Epilepsy Res* **108**, 811-815 (2014).
47. Mitterreiter S, *et al.* Bepridil and amiodarone simultaneously target the Alzheimer's disease beta- and gamma-secretase via distinct mechanisms. *J Neurosci* **30**, 8974-8983 (2010).
- 35 48. Schwede M, Garbett K, Mirnics K, Geschwind DH, Morrow EM. Genes for endosomal NHE6 and NHE9 are misregulated in autism brains. *Mol Psychiatry* **19**, 277-279 (2014).

## Fig. 1. ApoE isotype-specific differences in A $\beta$ clearance and specific receptor pathways

A. Fluorescent-based assay to monitor clearance of A $\beta$  peptides by astrocytes. B. Representative micrographs (left) and quantification (right) of ApoE3 and ApoE4 astrocytes subjected to 24h of A $\beta$  uptake. Fluorescence intensity and exposure settings were kept constant. Following background subtraction, fluorescence signal from cell associated A $\beta$  was reduced by 78% in ApoE4 astrocytes, relative to ApoE3 (\*\*\*\* $p=9.6 \times 10^{-71}$ ;  $n=100$ /condition; Student's t-test). C. Representative fluorescence-activated cell sorting (FACS) histograms (left) demonstrating A $\beta$  internalization by ApoE3 (top; orange) and ApoE4 astrocytes (bottom; grey) at 1h, 4h, and 16h; 10,000 cells/experimental condition. x-axis depicts A $\beta$  clearance in logarithmic scale and vertical dashed line represents median fluorescence intensity. Quantification (right) of biological triplicate measurements of A $\beta$  clearance from FACS analysis of ApoE3 and ApoE4 cells. Note significantly lower cell-associated A $\beta$  in ApoE4 relative to ApoE3 at all time points (53% lower, 1 h; 59% lower, 4 h; 65% lower, 16 h; \*\*\*\* $p<0.0001$ ;  $n=3$ ; Student's t-test). D. Representative FACS histograms (left) and quantification of mean fluorescence intensity of biological triplicates (right) demonstrating TFN uptake following 60 minutes of endocytosis by ApoE3 (green) and ApoE4 (grey) astrocytes (~1.5-fold higher; \*\*\*\* $p=6.8 \times 10^{-5}$ ;  $n=3$ ; Student's t-test). x-axis of the FACS histogram depicts TFN uptake in logarithmic scale and vertical dashed line represents median fluorescence intensity. E. ApoE3 and ApoE4 astrocytes were incubated with fluorescent transferrin (TFN) for 1h, to compare steady-state TFN uptake by confocal microscopy. Fluorescence intensity and exposure settings were kept constant. Representative images are shown (left) and mean fluorescence  $\pm$  s.e. was plotted (right). Following background subtraction, fluorescence signal was increased by ~2-fold in ApoE4 astrocytes, relative to ApoE3 (\*\*\*\* $p=3.5 \times 10^{-32}$ ;  $n=100$ /condition; Student's t-test). F. Quantification of mean fluorescence intensity of biological triplicates demonstrating dextran uptake by ApoE3 and ApoE4 astrocytes ( $p=0.870$ ;  $n=3$ ; Student's t-test). See related Supplementary Fig. S1.

Figure 1

**A Schematic**

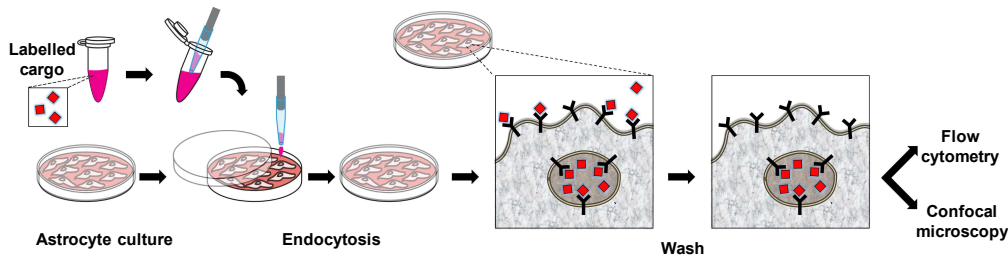

**B Aβ endocytosis- Confocal Microscopy**

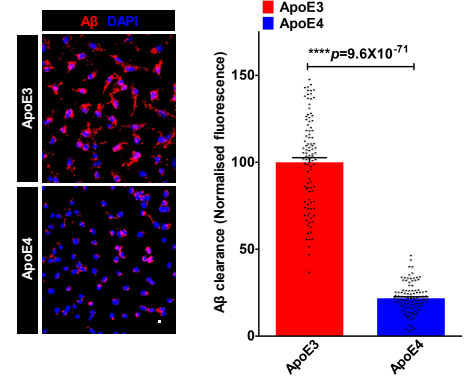

**C Aβ endocytosis- Flow Cytometry**

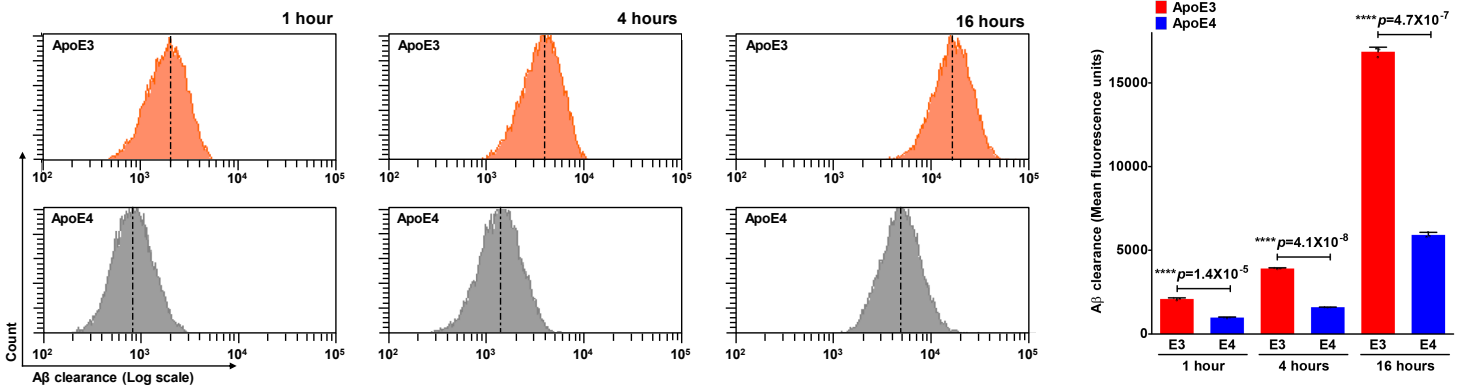

**D Transferrin endocytosis- Flow Cytometry**

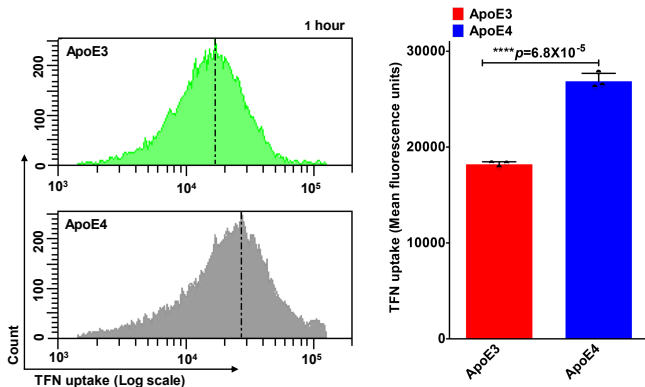

**E Transferrin endocytosis- Confocal Microscopy**

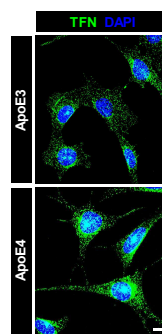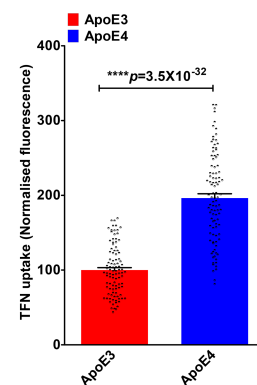

**F Dextran endocytosis**

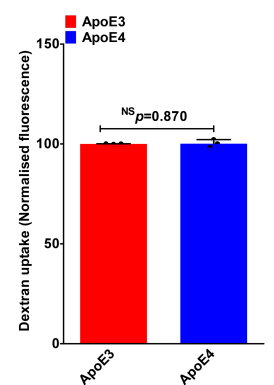

**Fig. S1: ApoE isotype-specific differences in A $\beta$  clearance. Related to Fig 1.**

(A-B) Representative micrographs (A) and quantification using Pearson correlation (B) determining fractional colocalization of A $\beta$  (red) with transferrin (TFN) (green) in DAPI- (blue) stained ApoE3 astrocytes, following 60 minutes of uptake. Note poor colocalization, as evident in the merge and orthogonal slices (Z) with fewer yellow puncta (Pearson's correlation:  $0.16 \pm 0.09$ ;  $n=45$ ), suggesting that a significant pool of internalized A $\beta$  escapes recycling endosomes. Representative micrographs (C) and quantification using Pearson correlation (D) determining fractional colocalization of A $\beta$  (red) with different endosomal-lysosomal compartment markers (green) in DAPI-(blue) stained ApoE3 astrocytes following 12h of uptake. Colocalization is evident in the merge and orthogonal slices (Z) as yellow puncta. (E-F) Time course of A $\beta$  accumulation in ApoE3 and ApoE4 astrocytes by confocal microscopy. Representative images are shown (E) and mean fluorescence  $\pm$  s.e. was plotted (F). ApoE4 cells show a reduced rate and total A $\beta$  accumulation, relative to ApoE3 astrocytes (\*\*\*\* $p < 0.0001$ ; Student's t-test). Scale bars, 10 $\mu$ m.

Figure S1

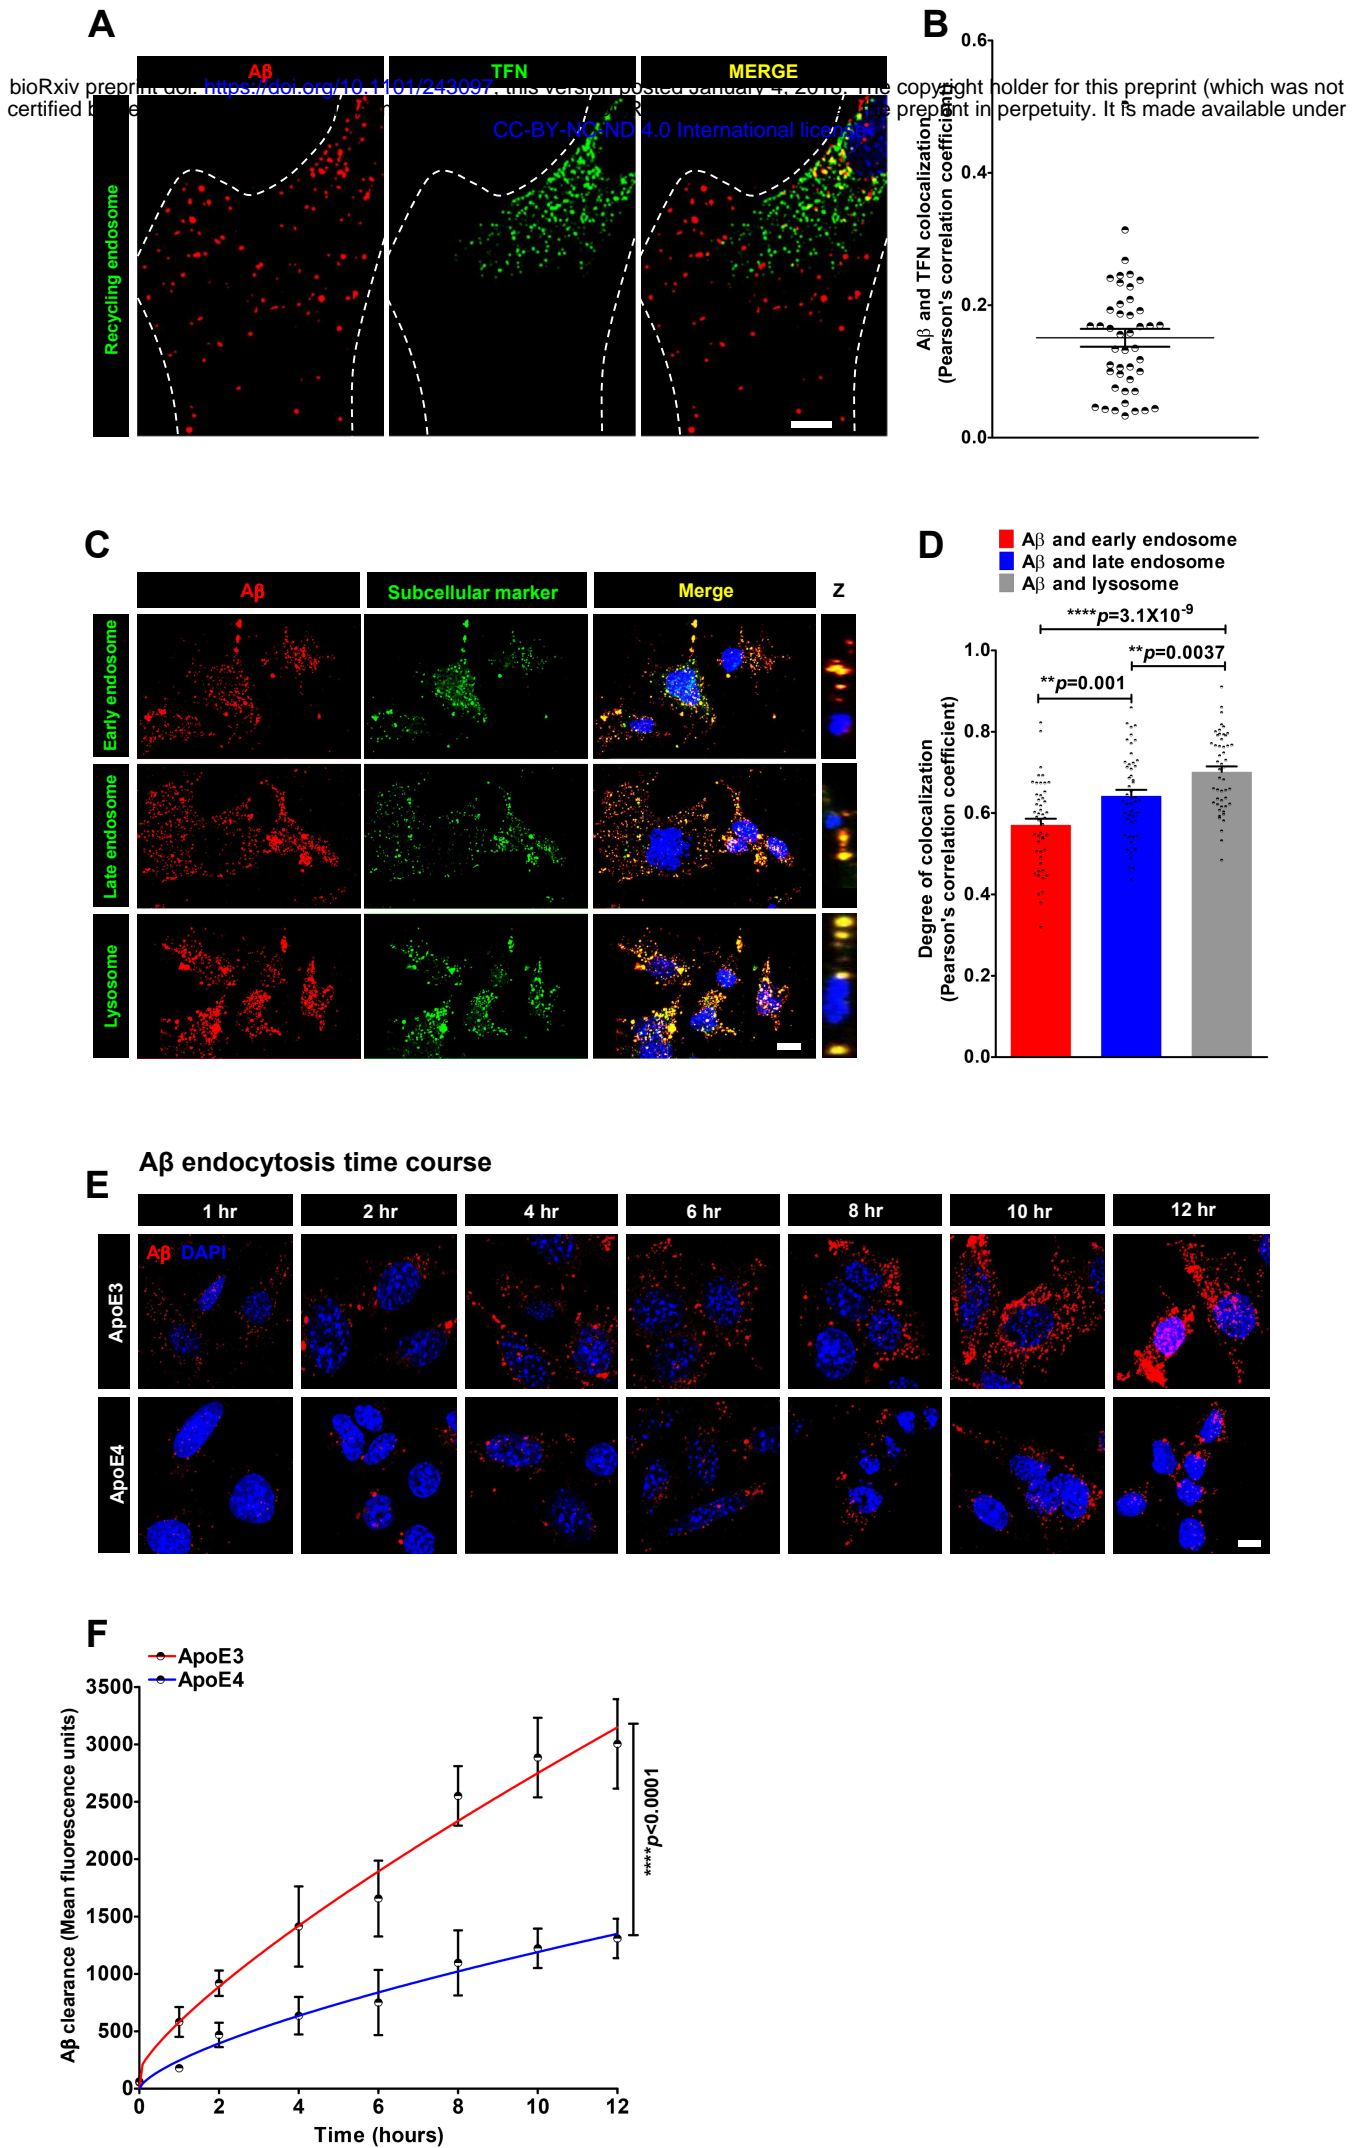

## Fig. 2. Reduced surface expression of LRP1 receptor in ApoE4 astrocytes

A. Four independent approaches to evaluate ApoE isotype-specific surface expression of LRP1. B. Surface biotinylation (left) and quantification (right) of biological triplicates showing that plasma membrane levels of LRP1 are depressed by ~50% in ApoE4 astrocytes, relative to ApoE3 (\*\*p=0.0022; n=3; Student's t-test). Plasma membrane protein Na<sup>+</sup>/K<sup>+</sup> ATPase is used as loading control. C. Fraction of LRP1 positive cells quantified following surface antibody labeling and FACS analysis of 10,000 live, non-permeabilized cells in biological triplicates. Unstained cells were used as control. Note ~43% lower surface LRP1 positivity in ApoE4 relative to ApoE3 (\*\*\*\*p=6.1X10<sup>-5</sup>; n=3; Student's t-test). D. Representative surface immunofluorescence micrographs (left) and quantification (right) showing prominent LRP1 staining on cell surface and processes and faint, ~49% lower, labeling on ApoE4 cells (\*\*\*\*p=2.4X10<sup>-16</sup>; n=75/condition; Student's t-test). E. Plasma membrane level of LRP1 receptor was monitored by a ligand (fluorescent A $\beta$ ) binding assay performed on ice that only allows A $\beta$  to bind surface receptors. Representative images are shown (left) and mean fluorescence  $\pm$  s.d. was plotted (right). Surface-bound A $\beta$  was 66% lower in ApoE4 astrocytes, relative to ApoE3 (n=75/condition; \*\*\*\*p=2.2X10<sup>-24</sup>; Student's t-test). Scale bars, 10 $\mu$ m. See related Supplementary Fig. S2.

20

Figure 2

**A Schematic**

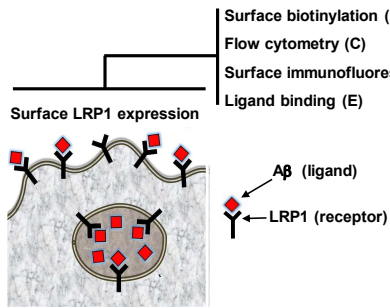

**B Surface biotinylation**

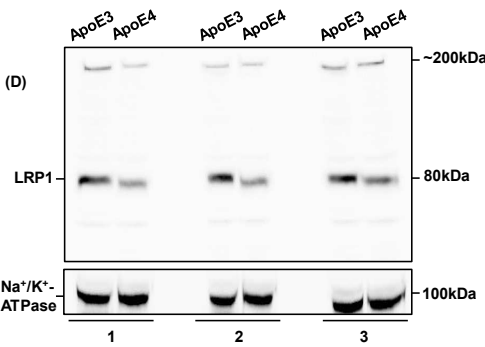

**C Flow cytometry**

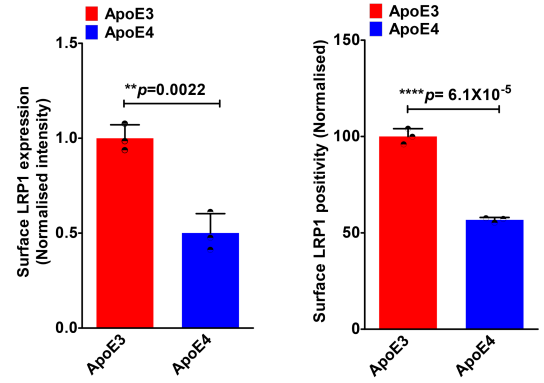

**D Surface immunofluorescence**

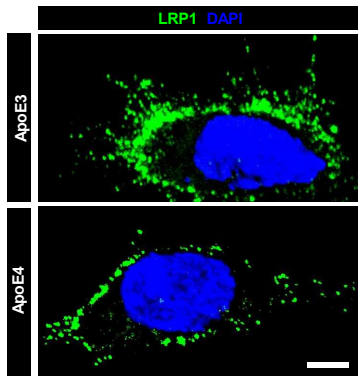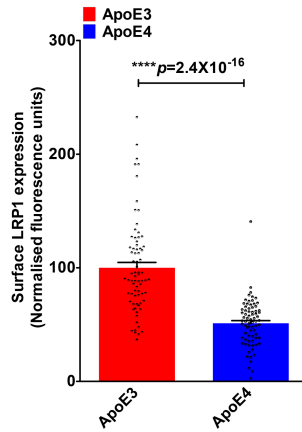

**E Ligand binding**

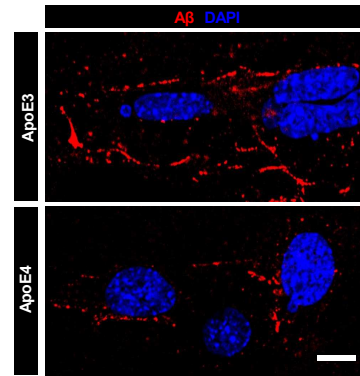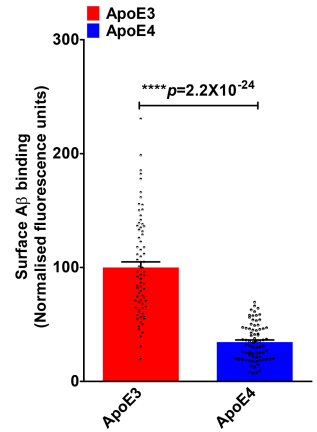

**Fig. S2: LRP1 transcript and total protein levels in ApoE isotypes. Related to Fig 2.**

A. Box and whisker plots of hippocampal LRP1 gene expression across control and clinical stages of (p=0.569; n=31; ANOVA). B. Expression plot of LRP1 with post-mortem brain pathology assessed via Braak staging scores across all 31 subjects, regardless of diagnosis. Scores on the Braak staging range from 0 to 6, with higher scores indicate worse neuropathology. No correlation was observed for LRP1 levels with Braak stage (Pearson correlation coefficient=0.21; n=31; p=0.2562). Black line depicts linear fit. (C-D) Forest plot (C) and quantification (D) of differential LRP1 expression between AD and control (Ctrl) data sets and pooled average represented as mean difference and 95% confidence interval (CI) of log base 2 expression, were obtained as described under “Experimental Methods.” (Black diamond/pooled average=0.08; 95% CI= -0.07, 0.22; control, n=87; AD patients, n=103; p=0.30). E. LRP1 gene expression showing no significant difference between ApoE3 and ApoE4 astrocytes (p=0.823; Student’s t-test). Representative Western blot (F) and quantification of three biological replicates (G) showing total LRP1 protein expression normalized to  $\beta$ -actin levels between ApoE3 and ApoE4 astrocytes (p=0.585; n=3; Student’s t-test).

20



# Figure S2

bioRxiv preprint doi: <https://doi.org/10.1101/243097>; this version posted January 4, 2018. The copyright holder for this preprint (which was not certified by peer review) is the author/funder, who has granted bioRxiv a license to display the preprint in perpetuity. It is made available under aCC-BY-NC-ND 4.0 International license.

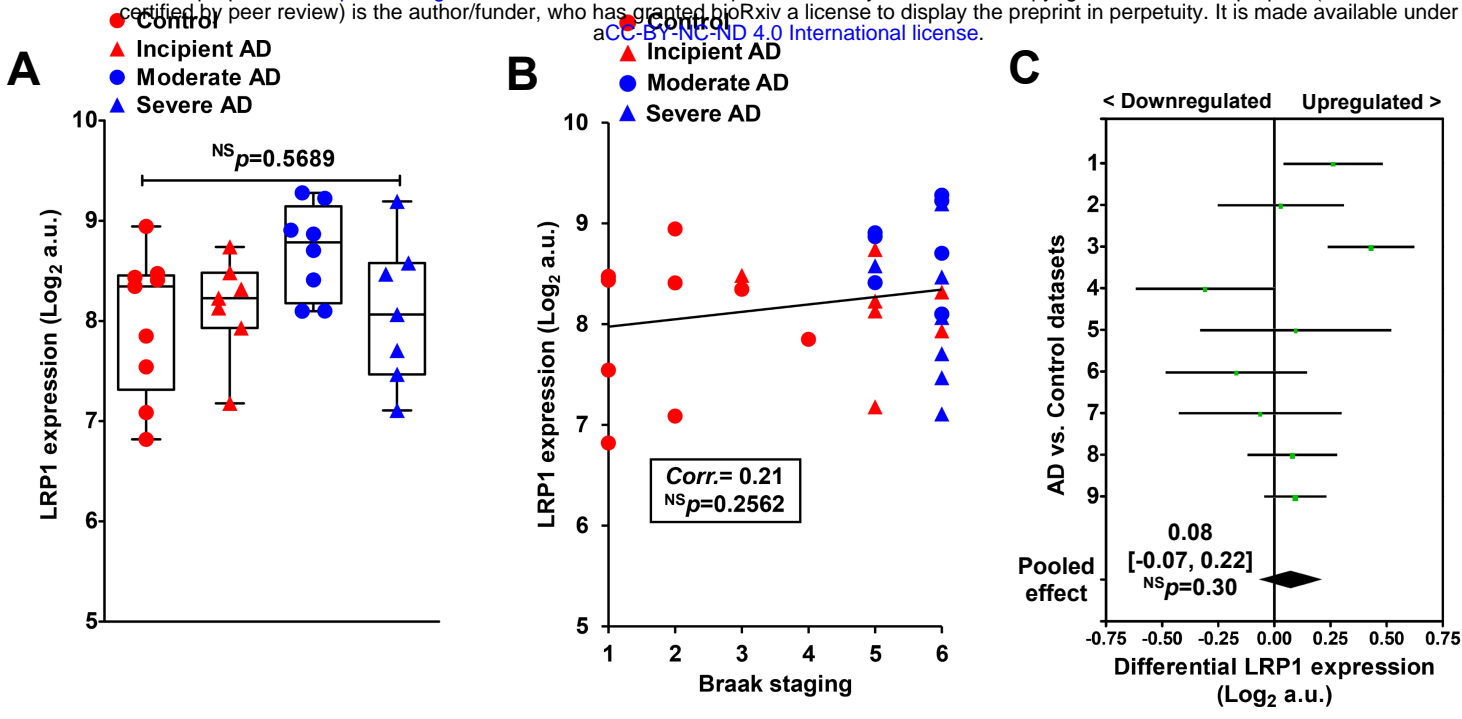

## D

| Data set             | Brain area                 | Ctrl      | AD         | Differential LRP1 expression [95% CI]* | Weight        | p-value      |
|----------------------|----------------------------|-----------|------------|----------------------------------------|---------------|--------------|
| 1                    | Superior frontal gyrus     | 9         | 22         | 0.26 [0.04, 0.48]                      | 12.6%         | 0.02         |
| 2                    | Parietal lobe              | 4         | 4          | 0.03 [-0.25, 0.31]                     | 10.6%         | 0.84         |
| 3                    | Primary visual cortex      | 12        | 17         | 0.43 [0.24, 0.62]                      | 13.6%         | $p < 0.0001$ |
| 4                    | Middle temporal gyrus      | 12        | 15         | -0.31 [-0.62, 0.00]                    | 9.7%          | 0.05         |
| 5                    | Middle temporal gyrus      | 5         | 7          | 0.10 [-0.33, 0.52]                     | 6.9%          | 0.66         |
| 6                    | Entorhinal cortex          | 12        | 10         | -0.17 [-0.48, 0.15]                    | 9.6%          | 0.3          |
| 7                    | Entorhinal cortex          | 8         | 9          | -0.06 [-0.43, 0.30]                    | 8.3%          | 0.74         |
| 8                    | Posterior cingulate cortex | 13        | 9          | 0.08 [-0.12, 0.28]                     | 13.3%         | 0.43         |
| 9                    | Hippocampus                | 12        | 10         | 0.09 [-0.05, 0.23]                     | 15.4%         | 0.19         |
| <b>Pooled effect</b> |                            | <b>87</b> | <b>103</b> | <b>0.08 [-0.07, 0.22]</b>              | <b>100.0%</b> | <b>0.30</b>  |

\*Random effects model (Log<sub>2</sub> a.u.)

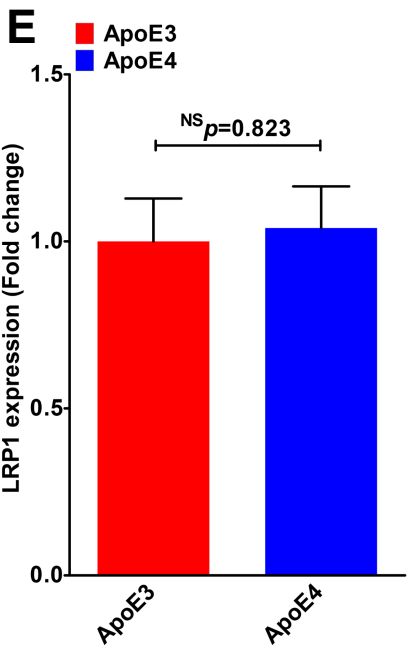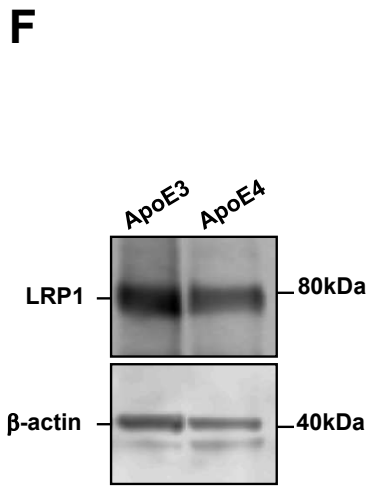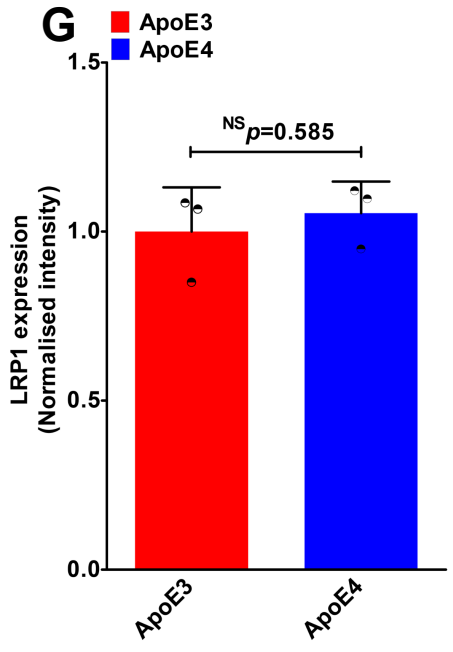

### Fig. 3: Endo-lysosomal pH is defective in ApoE4 astrocytes

A. Compartment-specific, ratiometric, pH-sensitive fluorescence reporters to probe ApoE-isotype dependent differences in endosomal, lysosomal and cytoplasmic pH.

5 Endosomal pH was measured by incubations with pH-sensitive FITC-Transferrin (TFN-FITC) together with pH non-sensitive Alexafluor 633-Transferrin (TFN-633). Lysosomal pH was measured by incubations with pH-sensitive pHrodo-green-Dextran (DXN-pHrodo green) together with pH non-sensitive Alexa Fluor 647-Dextran (DXN-647). Cytoplasmic pH was measured ratiometrically using pH-sensitive green and pH non-

10 sensitive red fluorescence of BCECF dye. B. Endosomal pH in ApoE4 astrocytes was strongly reduced by  $\sim 0.84$  pH unit, relative to ApoE3 (\*\* $p=0.0037$ ;  $n=3$ ; Student's t-test). C. Lysosomal pH was elevated by  $>1$  pH unit in ApoE4 astrocytes (\*\*\*\* $p=0.0009$ ;  $n=3$ ; Student's t-test). D. Cytoplasmic pH showed no significant differences between ApoE3 and ApoE4 astrocytes ( $p=0.2904$ ;  $n=3$ ; Student's t-test). E. Monensin treatment (50 $\mu$ M

15 for 1h) corrected hyperacidic endosomal pH in ApoE4 astrocytes, relative to vehicle treatment (\*\*\*\* $p=0.0005$ ;  $n=3$ ; Student's t-test). F. Quantitation of A $\beta$  clearance from FACS analysis of 10,000 cells in biological triplicates confirmed restoration of A $\beta$  clearance in ApoE4 astrocytes to ApoE3 levels with monensin treatment (\*\*\*\* $p=6.5 \times 10^{-7}$ ;  $n=3$ ; Student's t-test). G. Representative micrographs (left) and quantification (right)

20 showing  $\sim 2.9$ -fold increase in cell-associated A $\beta$  in ApoE4 astrocytes with monensin treatment (\*\*\*\* $p=2.4 \times 10^{-20}$ ;  $n=50$ ; Student's t-test). Scale bars, 10 $\mu$ m.

Figure 3

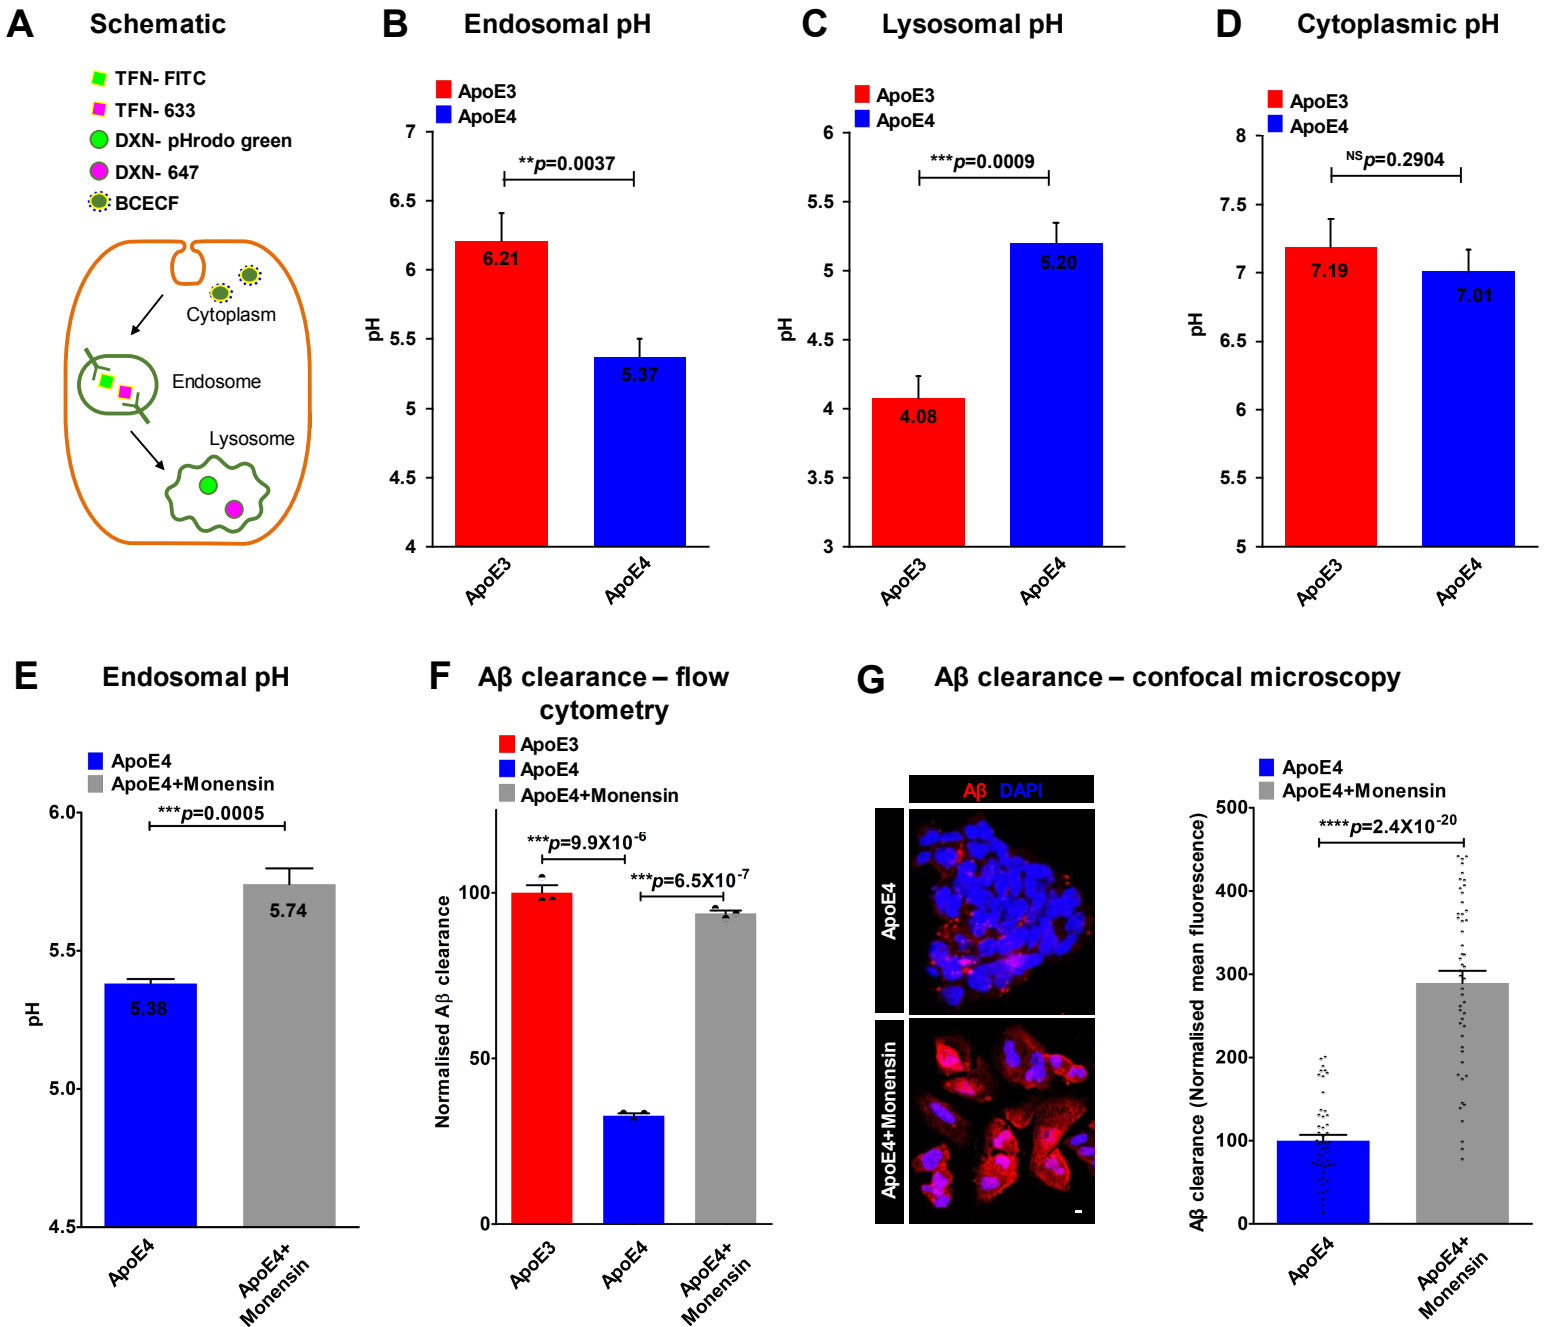

#### Fig. 4: NHE6 restores defective A $\beta$ clearance in ApoE4 astrocytes

A. Endosomal pH is precisely tuned by a balance of proton pumping (acidification) through the V-ATPase and proton leak (alkalization) via NHE6. B. Box-plots of NHE6  
5 transcript levels in postmortem brains extracted from a large microarray dataset ( $n=363$ , GSE15222) showing significant downregulation of NHE6 expression in ApoE4+ brains ( $****p=1.2 \times 10^{-10}$ ; Student's t-test). C. Quantitative PCR (qPCR) analysis of NHE6 transcript revealed significantly lower expression in ApoE4 astrocytes, relative to ApoE3 (~56% lower,  $****p=0.0005$ ,  $n=3$ ; Student's t-test). No difference in NHE6 levels was  
10 observed between ApoE3 astrocytes and isogenic ApoE<sup>KO</sup> astrocytes ( $p=0.628$ ;  $n=3$ ; Student's t-test). D. A $\beta$  levels were significantly higher in the brains of NHE6-null mouse model (NHE6<sup>KO</sup>), relative to WT ( $**p=0.0013$ ;  $n=5$ /condition; Student's t-test), consistent with our hypothesis. A $\beta$  was measured using ELISA and normalized to total protein concentration in the brain homogenate. E. FACS scatter plots (left) and quantification  
15 (right) demonstrating A $\beta$  internalization by empty vector expressing ApoE3 (orange) and ApoE4 (grey) astrocytes and ApoE4 astrocytes with restored NHE6 expression (green). Note remarkable correction of A $\beta$  clearance in ApoE4 astrocytes with NHE6 expression to ApoE3 levels ( $****p=4.9 \times 10^{-6}$ ;  $n=3$ ; Student's t-test). F. Representative surface immunofluorescence images (left) and quantification (right) of non-permeabilized cells  
20 showing ~2.5-fold increase in plasma membrane LRP1 expression in ApoE4 cells expressing exogenous NHE6 ( $****p=6.02 \times 10^{-12}$ ;  $n=40$ /condition; Student's t-test). Scale bars, 2.5 $\mu$ m. See related Supplementary Fig. S3.

Figure 4

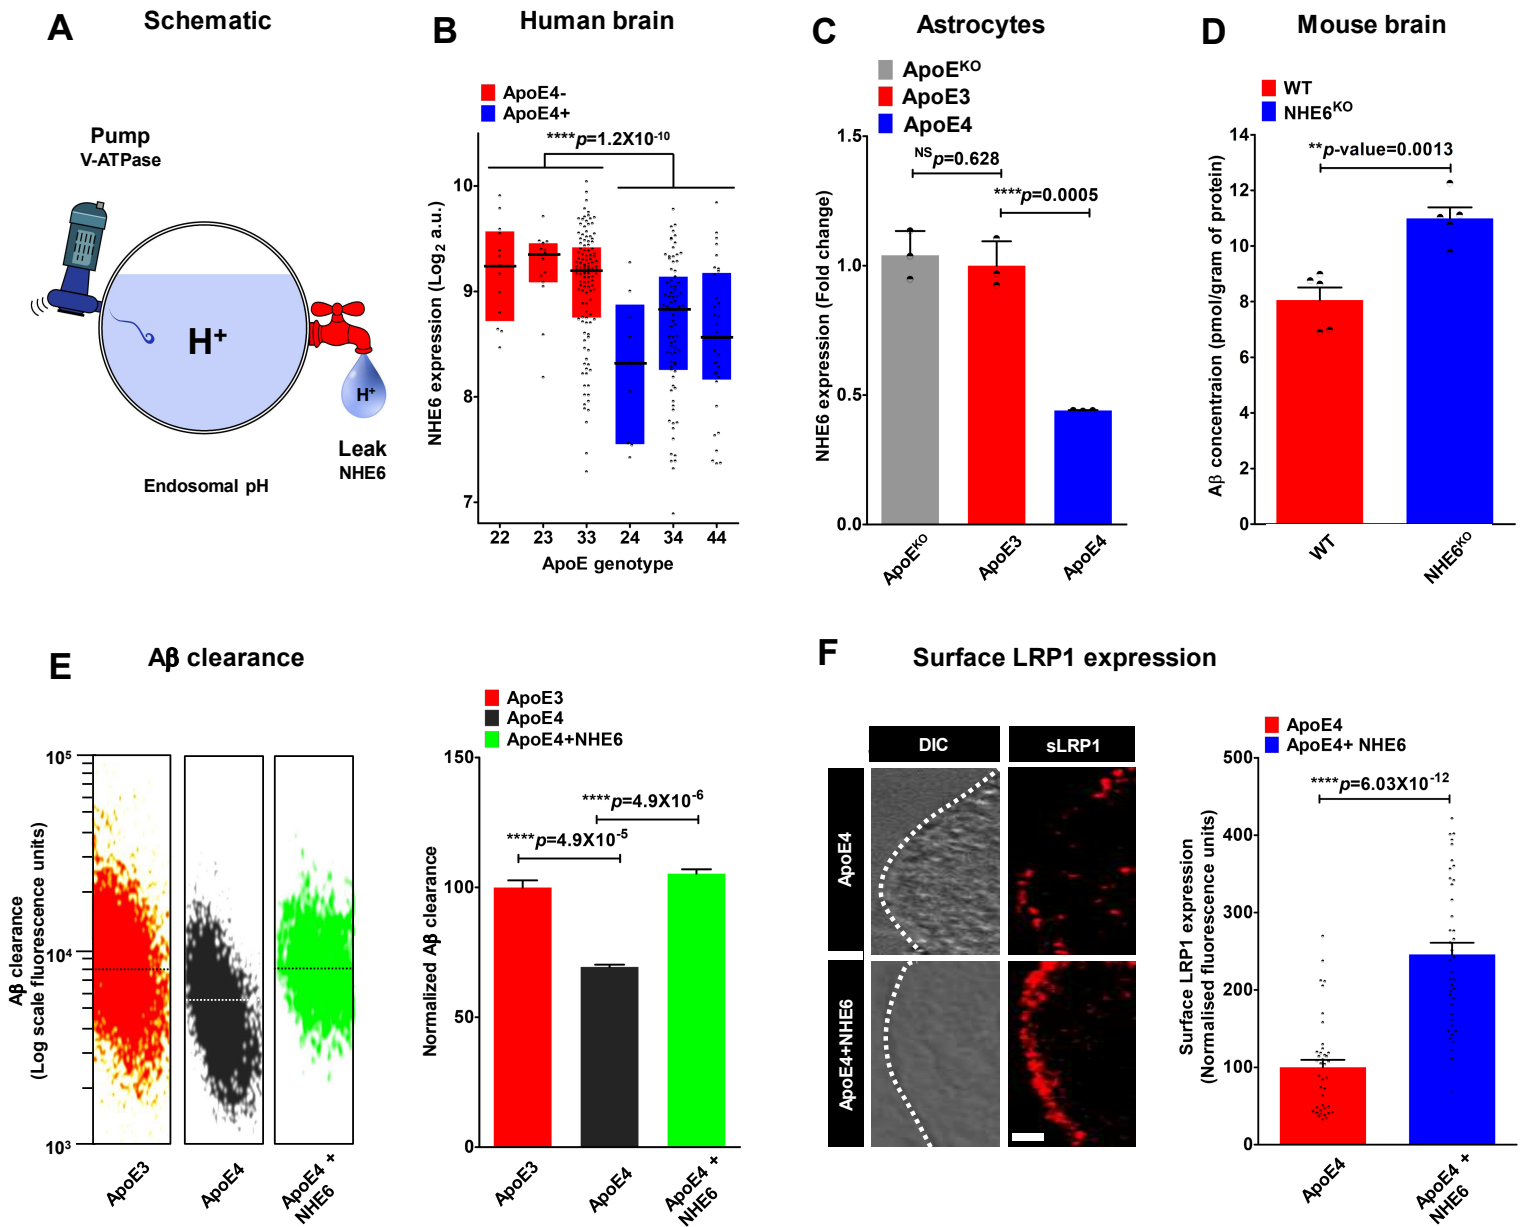

**Fig. S3. NHE6 corrects defective surface LRP1 expression in ApoE4 astrocytes.**  
**Related to Fig 4.**

A. Gene ontology (GO) analysis of top-100 downregulated genes in post-mortem AD  
5 brains obtained as described under “Experimental Methods.” Enrichment scores and p-  
values for top-5 GO biological process were shown. Note that genes involved in  
hydrogen ion transmembrane transport, including NHE6 and V-ATPase subunits  
exhibited highest enrichment scores. B. Quantitative PCR (qPCR) analysis of NHE9  
transcript revealed significantly lower expression in ApoE4 astrocytes, relative to ApoE3  
10 (~70% lower; \*\*\*\* $p=2.7 \times 10^{-5}$ ;  $n=3$ ; Student’s t-test). No changes in mRNA levels were  
observed for the closely related plasma membrane NHE1 isoform ( $p=0.946$ ;  $n=3$ ;  
Student’s t-test). Significantly lower mRNA levels for lysosomal V-ATPase V0a1 subunit  
in ApoE4 astrocytes, relative to ApoE3 (~67% lower; \*\*\*\* $p=9.7 \times 10^{-5}$ ;  $n=3$ ; Student’s t-  
test). C. Consistent with clinical reports of microcephaly in Christianson syndrome  
15 patients, 7-month old hemizygous NHE6<sup>KO</sup> mice showed significantly lower brain weight,  
relative to wild-type mice. D. Lentiviral vector mediated expression of NHE6 in ApoE4  
astrocytes with low endogenous NHE6 levels results in alkalization of endosomal pH. E.  
Representative micrographs (left) and quantification using Pearson correlation (right)  
determining fractional colocalization of NHE9 (green) with transferrin (TFN) (red) in  
20 DAPI-(blue) stained ApoE4 astrocytes following 60 minutes of uptake. Note prominent  
endosomal colocalization of NHE9 as evident in the merge and orthogonal slices (Z) as  
yellow puncta (Pearson’s correlation:  $0.74 \pm 0.10$ ;  $n=40$ ). F. Representative FACS  
histograms (left) and quantification of mean fluorescence intensity of biological  
triplicates (right) demonstrating no difference in A $\beta$  internalization between ApoE4 (red)  
25 and ApoE4 astrocytes with NHE9-GFP expression (green). x-axis depicts A $\beta$  clearance  
in logarithmic scale and vertical dashed line represents median fluorescence intensity  
( $p=0.155$ ;  $n=3$ ; Student’s t-test). (G-H) Representative immunofluorescence images of  
permeabilized, fixed ApoE4 astrocytes expressing NHE6-GFP showing overlap of  
NHE6 (green) with red-labeled EEA1 (G) and LRP1 (H). Colocalization is evident in the  
30 merge and orthogonal slices (Z) as yellow puncta. I. Representative blots showing

surface (left) and total (right) LRP1 protein levels with NHE6-GFP expression (detected using anti-GFP antibody) relative to empty vector transfection. As loading control, surface biotinylated proteins were visualized with HRP-streptavidin and by probing against tubulin. GAPDH was used as a loading control for western analysis of total LRP1 levels. Quantification (extreme right) of blots showed robust ~5.7-fold higher surface LRP1 levels in ApoE4 cells with restored NHE6 expression, compared to transfection with empty vector (\*\* $p=0.002$ ;  $n=3$ ; Student's t-test). No concomitant changes in total LRP1 levels ( $p=0.390$ ;  $n=3$ ; Student's t-test) suggesting that increased surface LRP1 was due to posttranslational redistribution of the existing cellular LRP1 pool. J. qPCR analysis confirmed no concomitant changes in LRP1 transcript with lentiviral transduction of NHE6-GFP, relative to empty vector control ( $p=0.797$ ;  $n=3$ ; Student's t-test). Scale bars, 10 $\mu$ m.

**A**

| Rank | GO biological process                   | Fold Enrichment | p-value               |
|------|-----------------------------------------|-----------------|-----------------------|
| 1    | Hydrogen ion transmembrane transport    | 15.21           | 5.70X10 <sup>-4</sup> |
| 2    | Neurotransmitter transport              | 11.69           | 2.20X10 <sup>-2</sup> |
| 3    | Purine ribonucleotide metabolic process | 6.68            | 2.27X10 <sup>-2</sup> |
| 4    | Monovalent inorganic cation transport   | 6.41            | 1.03X10 <sup>-3</sup> |
| 5    | Synaptic transmission                   | 6.14            | 5.43X10 <sup>-4</sup> |

**B**

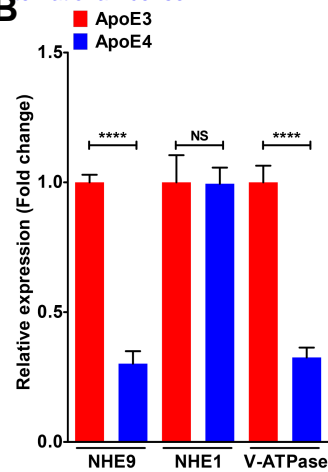

**C**

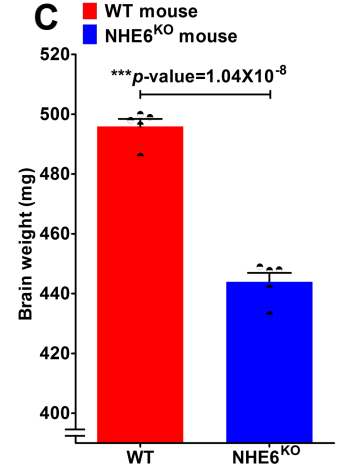

**D**

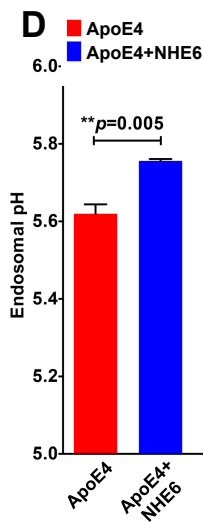

**E**

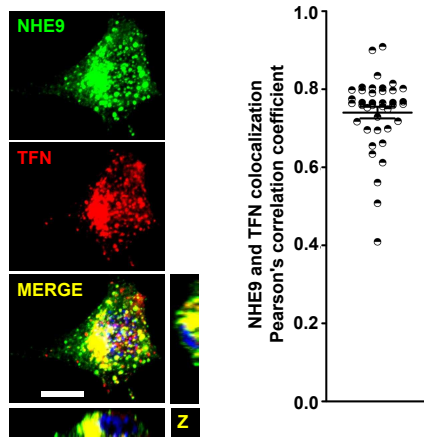

**F**

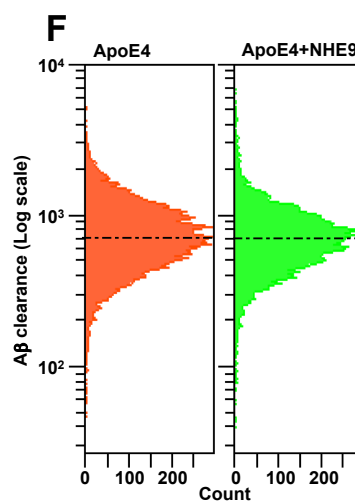

**G**

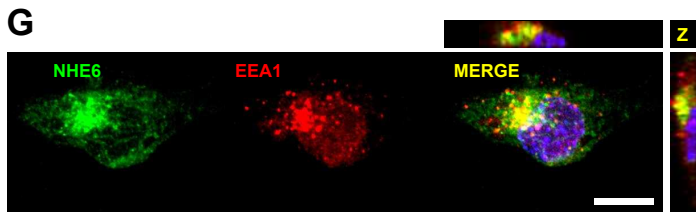

**H**

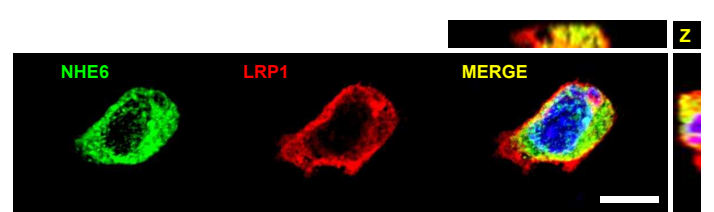

**I**

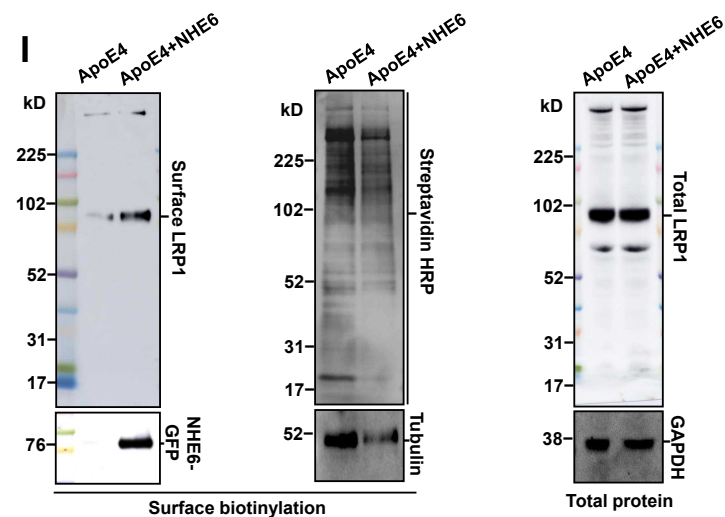

**J**

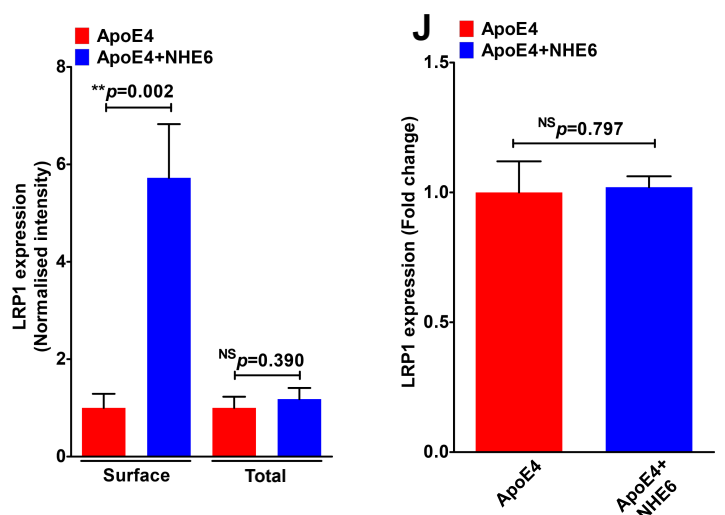



## Fig. 5: HDAC inhibitors rescue NHE6-mediated A $\beta$ clearance deficits

A. ApoE4 increases nuclear translocation of histone deacetylases (HDACs), whereas ApoE3 increases histone acetylation and transcription factor (TF) binding. Therapeutic effects of HDAC inhibitors are potentially mediated by reducing effects of ApoE4-induced nuclear translocation of HDACs. B. Representative micrographs (left) and quantification using Pearson correlation coefficient (right) determining fractional colocalization of HDAC4 (red) with DAPI (blue) in ApoE3 and ApoE4 astrocytes. Colocalization is evident in the merge and orthogonal slices (Z) as magenta puncta. Note prominent overlap between HDAC4 and DAPI, consistent with increased nuclear translocation, in ApoE4 astrocytes (Pearson's correlation coefficient= ApoE3:  $0.17 \pm 0.01$  vs. ApoE4:  $0.51 \pm 0.02$ ;  $n=150$ /condition; \*\*\*\* $p=4.6 \times 10^{-44}$ ; Student's t-test). C. qPCR analysis to determine the potential of HDAC inhibitor panel to augment the expression of NHE6 in ApoE4 astrocytes following 12h treatment. Note that inhibitors of class I (CI994) or class II (MC1568) HDACs resulted in minimal changes in NHE6 expression. Broad-spectrum drugs inhibiting both classes, including sodium butyrate, sodium valproate, LBH589, TSA, and SAHA, resulted in significant restoration of NHE6 expression levels in ApoE4 astrocytes to levels comparable to ApoE3 astrocytes (\*\*\*\* $p < 0.0001$ ;  $n=3$ ; Student's t-test). Other narrow spectrum HDAC inhibitors studied here (tubacin/TUB and clioquinol) had no significant effect. D. HDAC inhibition by TSA treatment ( $5 \mu\text{M}$  for 12h) corrected hyperacidic endosomal pH in ApoE4 astrocyte, relative to DMSO treatment (\*\* $p=0.0014$ ;  $n=3$ ; Student's t-test). E. TSA treatment ( $5 \mu\text{M}$  for 12h) did not affect lysosomal pH in ApoE4 astrocyte, relative to DMSO treatment ( $p=0.797$ ;  $n=3$ ; Student's t-test). F. Quantitation of A $\beta$  clearance from FACS analysis of 10,000 cells in biological triplicates to determine efficacy of panel of HDAC inhibitors to rescue A $\beta$  clearance deficits in ApoE4 astrocytes. Note prominent linear relationship between A $\beta$  clearance and the fold-change in NHE6 expression ( $R^2=0.7884$ ;  $p < 0.0001$ ) elicited by DMSO and nine HDAC inhibitors. Representative FACS histogram demonstrating increase A $\beta$  internalization by ApoE4 with SAHA treatment is shown on the right. G. Representative micrographs (left) and quantification (right) demonstrating

internalized A $\beta$  following SAHA treatment. Note prominent, vesicular A $\beta$  staining in SAHA treated ApoE4 cells, in contrast to faint, diffuse staining in vehicle control (\*\*\*\* $p=9.9 \times 10^{-13}$ ;  $n=160$ /condition; Student's t-test). Scale bars, 10 $\mu$ m. See related Supplementary Fig. S4.

5

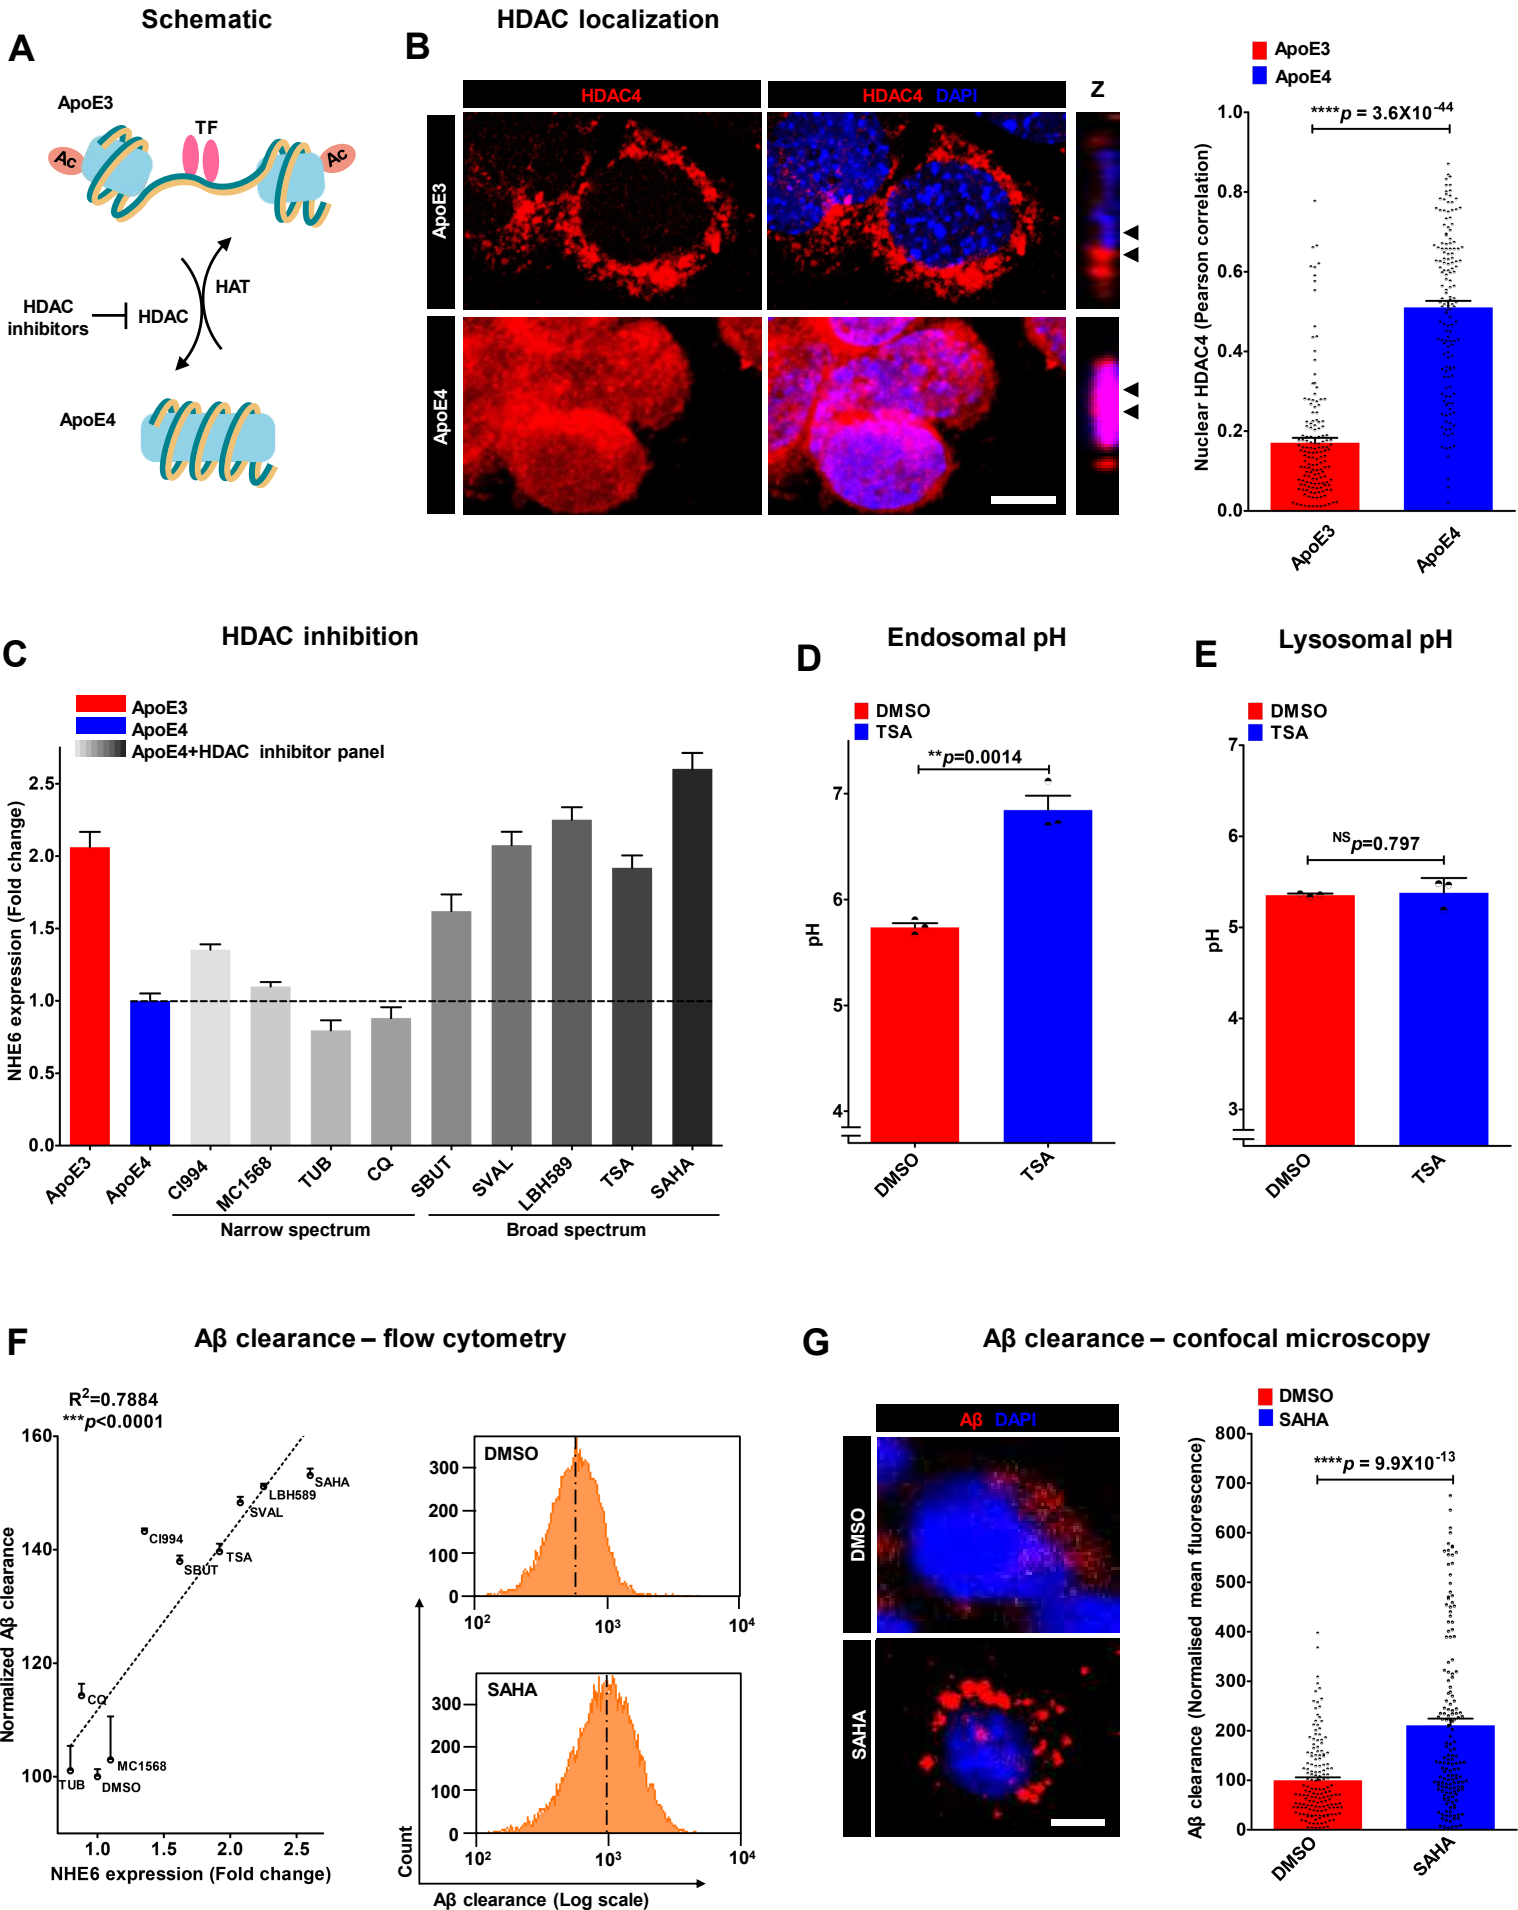

**Fig. S4: HDAC inhibitors restore NHE6 levels and correct A $\beta$  clearance deficits in ApoE4 astrocytes. Related to Fig 5.**

5 A. Western blot of nuclear fractions for HDAC4 levels in ApoE4 astrocytes relative to ApoE3. As loading control, transferred proteins were visualized with Gelcode Blue staining and by probing against actin. Higher HDAC4 in the nuclear fraction is suggestive of increased nuclear translocation of HDACs in ApoE4 cells. (B-C) Dose response relationship to determine the potential of increasing dosage (1.25-20 $\mu$ M) of TSA (B) and SAHA (C) to enhance expression of NHE6 in ApoE4 astrocytes. Note  
10 characteristic sigmoidal dose-response curves with half-maximal response (EC50) of 6.50 $\pm$ 0.36 $\mu$ M and 6.81 $\pm$ 0.53 $\mu$ M for TSA and SAHA, respectively. D. qPCR analysis revealed no significant changes in NHE9 expression with TSA or SAHA treatment of ApoE4 astrocytes. (E-F) Western blot showing acetylation of histone H3 (ACh3) (E) and histone H4 (ACh4) (F) following 60-minutes treatment with TSA and SAHA. As loading  
15 control, transferred proteins were visualized with Gelcode Blue staining and by probing against tubulin. G. TSA or SAHA treatment in ApoE4 astrocytes did not affect cell viability measured using trypan blue exclusion. H. Quantitation of measurements of A $\beta$  clearance from FACS analysis of ApoE3 and ApoE4 cells with treated with DMSO and ApoE4 cells with treatment with a panel of HADC inhibitor. Note that broad-spectrum  
20 HDAC inhibitors (e.g. TSA and SAHA) that significantly restored NHE6 expression elicited proportionally complete correction of defective A $\beta$  clearance in ApoE4 astrocytes to levels similar (up to 92.4%) to ApoE3 cells. HDAC inhibitors with lower induction of NHE6 expression (e.g. MC1568 and tubacin) conferred minimal changes in A $\beta$  clearance.

25

Figure S4

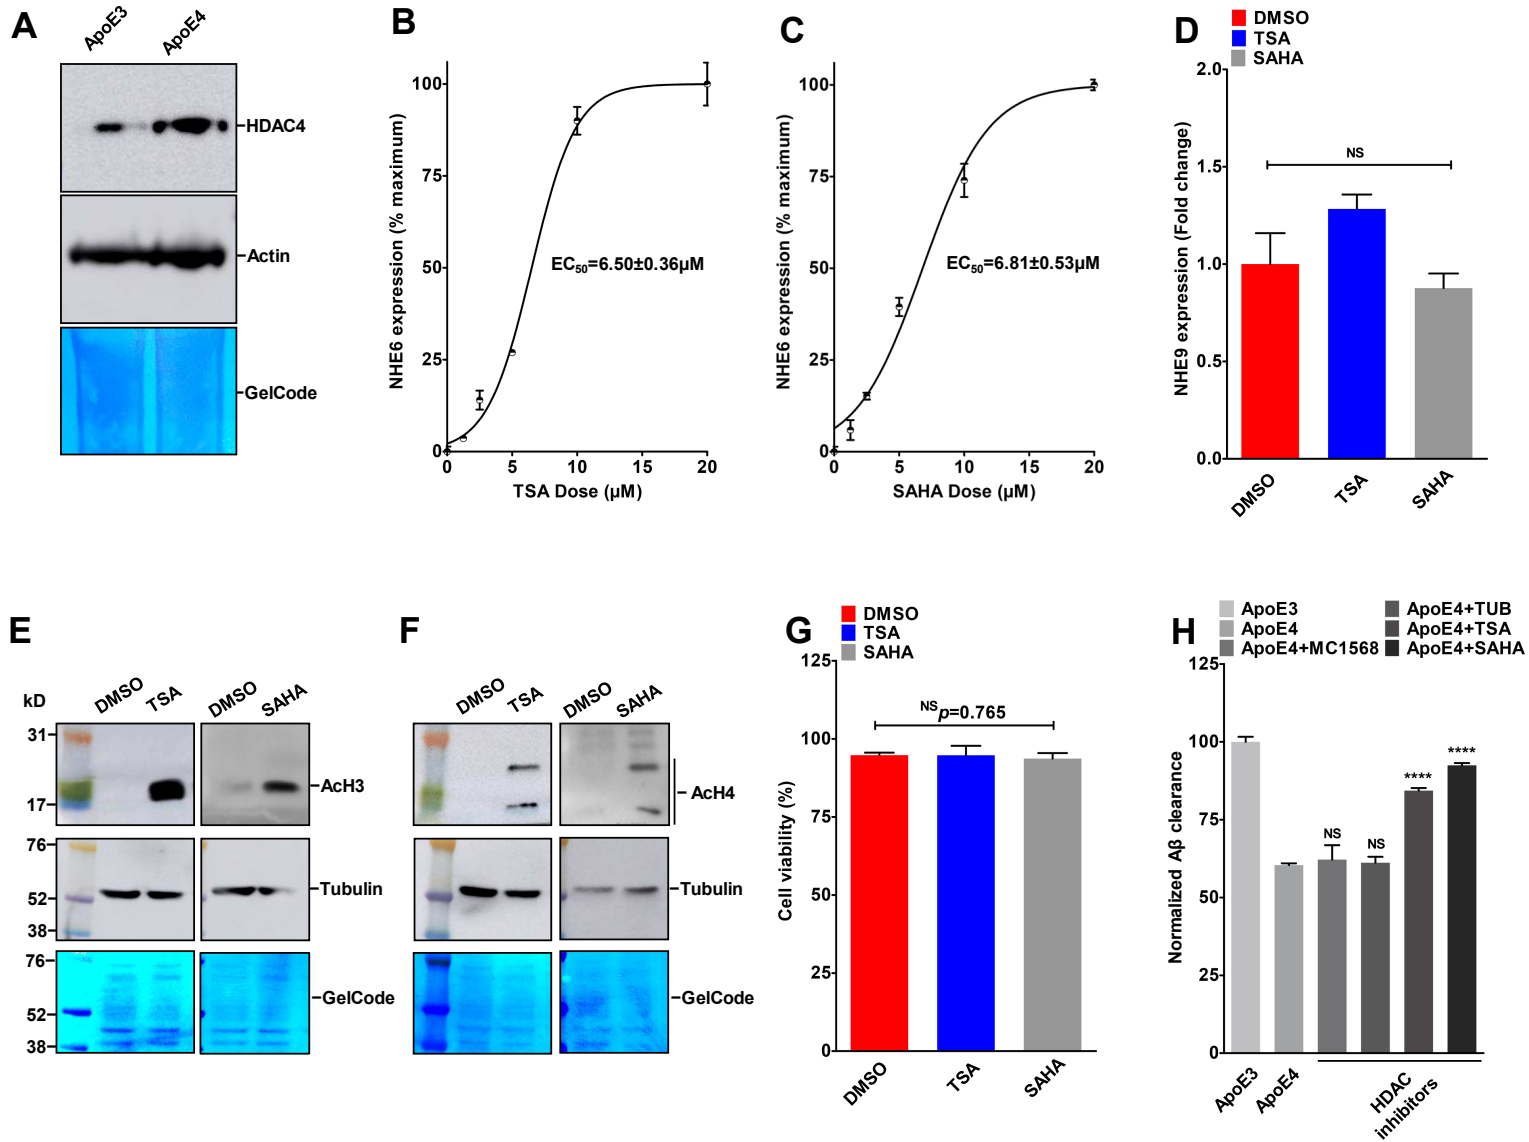

## **Fig. 6: Proposed Role for NHE6 in A $\beta$ clearance in astrocytes**

Amyloid beta (A $\beta$ ) receptor LRP1 is constitutively recycled to the cell surface through early and recycling endosomes (EE and RE) in ApoE3 astrocytes. Loss of NHE6  
5 expression in ApoE4 astrocytes hyperacidifies endosomes and impairs trafficking of LRP1 receptor resulting in defective A $\beta$  clearance. Histone deacetylase inhibitors (HDACi) restore expression of NHE6 and A $\beta$  clearance in ApoE4 cells.

Figure 6

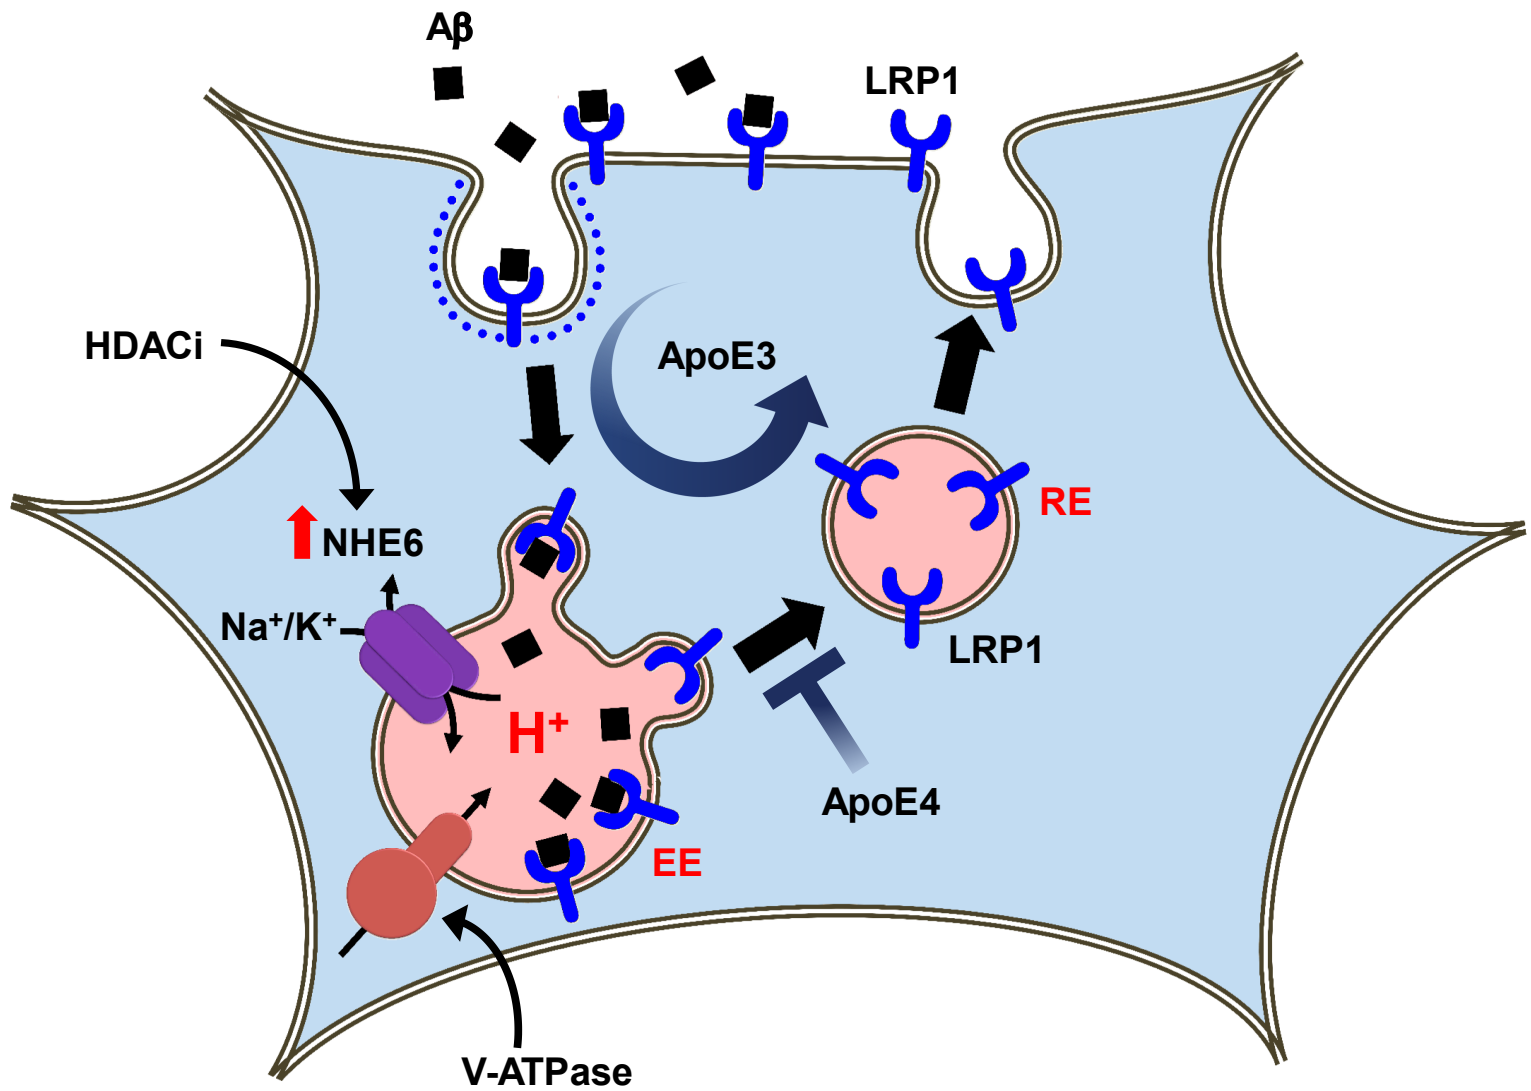

## Materials and Methods

### Animals

All procedures were carried out in accordance with The Institutional Animal Care and Use Committee of the University of California, San Francisco and the Johns Hopkins University School of Medicine, Baltimore. The Slc9a6 knockout mice (#005843, strain name B6.129P2-Slc9a6<sup>tm1Dgen</sup>) were obtained from Jackson Laboratories. The model was engineered by inserting the LacZ reporter gene, which encodes  $\beta$ -galactosidase into the Slc9a6 genomic locus (Deltagen). In all experiments, male Slc9a6<sup>-Y</sup> mice were used as mutants and wild-type male Slc9a6<sup>+Y</sup> mice as controls. On average, five mice of each genotype were used in each experiment.

### A $\beta$ clearance assays

Human ApoE isoform-expressing (ApoE3 and ApoE4) astrocyte cells were plated in six-well plates and were grown to confluence. To measure A $\beta$  uptake, cells were washed with serum-free medium (SFM) followed by incubation with 100 nM fluorescently-labeled HiLyte Fluor 647-A $\beta$ 40 (#AS-64161, AnaSpec) for various timepoints. Cells were washed with PBS and fixed for confocal imaging using the LSM 700 Confocal microscope (Zeiss), or trypsinized for flow cytometry analysis of ~10,000 cells in biological triplicates using the FACS Aria instrument (BD Biosciences). Unstained cells without any exposure to fluorescently-labeled A $\beta$  were used as a control for background fluorescence.

### A $\beta$ assay on mouse brain

The human/rat/mouse  $\beta$  amyloid ELISA kit was from Wako (#294-64701) was used for the estimation of A $\beta$ 40 levels in brain homogenates, as per manufacturer's instructions. Briefly, brains of mice were dissected on ice, weighed and homogenized in ice-cold RIPA buffer (PBS+ 1% Triton+ 0.1% SDS+ 0.5% deoxycholate) containing protease inhibitor (Roche). Lysate was centrifuged for 8-10 minutes at 8,000-9,000 rpm and supernatant



was collected and used for ELISA. BCA method was used to measure the total protein concentrations. A $\beta$ 40 was normalized to total protein concentration in the lysate.

### **Endosomal, lysosomal and cytoplasmic pH measurement**

Detailed protocols are provided in the Extended Experimental Procedures

## **5 Statistical Analysis**

All data were analyzed statistically by Student's t test, ANOVA and linear regression test using GraphPad Prism. All data are presented as mean  $\pm$  SD.

## SUPPLEMENTAL INFORMATION

Supplemental Information includes Extended Experimental Procedures and four figures.

### Extended Experimental Procedures

#### Antibodies and Reagents

5 Mouse monoclonal antibodies used were External epitope Anti-LRP1 (#ab20753, Abcam), Anti-HDAC4 (4A3) (#5392, Cell Signaling Technology), Anti- $\alpha$ -Tubulin (#T9026, Sigma), Anti- $\beta$ -Actin (#A5441, Sigma), and Anti-GFP (4B10) (#2955, Cell Signaling Technology). Rabbit monoclonal antibodies used were Internal epitope Anti-LRP1 (#ab92544, Abcam), Anti-Na<sup>+</sup>/K<sup>+</sup>-ATPase (#3010, Cell Signaling Technology),  
10 Anti-Acetyl-Histone H3 (Lys14) (D4B9) (#7627, Cell Signaling Technology), and Anti-Acetyl-Histone H4 (Lys8) (#2594, Cell Signaling Technology). Monensin (#M5273), KG501 (#70485), Sodium valproate (#P4543), and Sodium butyrate (#B5887) were obtained from Sigma. Clioquinol (#130-26-7) was purchased from Calbiochem. HDAC inhibitors CI994(#A4102), MC1568(#A4094), Tubacin (#A4501), LBH589 (#A8178),  
15 TSA (#A8183), and SAHA (#A4084) were from ApexBio Technology.

#### Cell Culture

Human ApoE isoform-expressing (ApoE3 and ApoE4) and ApoE<sup>KO</sup> immortalized astrocytes (gift from Dr. David M Holtzman, Washington University, St. Louis) were maintained in DME-F12 (Invitrogen) supplemented with 10% fetal bovine serum (FBS)  
20 (Invitrogen) and 200 $\mu$ g/ml Geneticin/G418 (Corning Cellgro). Culture conditions were in a 5% CO<sub>2</sub> incubator at 37°C. Cell viability was measured using the trypan blue exclusion method.

#### Plasmids and transfection

NHE6-GFP and NHE9-GFP were cloned into FUGW-lentiviral vector into the BamHI  
25 site. Astrocytes were transfected using lentiviral packaging and expression.

## Bioinformatics

Mammalian gene expression datasets included in the study were GSE5281, GSE1297, GSE4757, GSE5281, GSE16759, E-MEXP-2280, and GSE15222. Gene Ontology (GO) enrichment analysis was performed using tools provided at the GO web site  
5 (http://www.geneontology.org). Pooled analysis was performed using the RevMan program (Nordic Cochrane Centre), as previously described<sup>43</sup>.

## Transferrin and dextran uptake

Steady state transferrin uptake was measured using flow cytometry and confocal microscopy, as we previously described<sup>28, 43</sup>. Briefly, cells were rinsed and incubated in  
10 serum-free medium for 30min, to remove residual transferrin and then incubated with Alexa Fluor 633-Transferrin (#T23362, Thermo Fisher Scientific) (100 µg/ml) at 37°C for 60min. Transferrin uptake was stopped by placing the cells on ice. Excess transferrin was removed by washing with ice-cold serum-free DMEM and PBS, whereas bound transferrin was removed by 2x washing with ice-cold pH 5.0 PBS and pH 7.0 PBS. Cells  
15 were fixed with a solution of 4% paraformaldehyde, for confocal imaging using the LSM 700 Confocal microscope (Zeiss), or trypsinized for flow cytometry analysis of ~10,000 cells in biological triplicates using the FACS Aria instrument (BD Biosciences). Similarly, dextran uptake was quantified using flow cytometry following 12 hours of incubation with Alexa Fluor 647-Dextran (#D22914, Thermo Fisher Scientific) (10 µg/ml) at 37°C.  
20 Unstained cells without any exposure to fluorescently-labeled cargo were used as a control for background fluorescence.

## Quantitative Real-time PCR

mRNA was extracted from cell cultures using the RNeasy Mini kit (#74104, Qiagen) with DNase I (#10104159001, Roche) treatment, following the manufacturer's  
25 instructions. Complementary DNA was synthesized using the high-Capacity RNA-to-cDNA Kit (#4387406, Applied Biosystems). Quantitative real-time PCR analysis was performed using the 7500 Real-Time PCR System (Applied Biosystems) using Taqman Fast universal PCR Master Mix (#4352042, Applied Biosystems). Taqman

gene expression assay probes used in this study are: NHE6, Mm00555445\_m1; NHE9, Mm00626012\_m1; NHE1, Mm00444270\_m1; ATP6V0A1, Mm00444210\_m1; LRP1, Mm00464608\_m1, ACTB, Mm02619580\_g1; and GAPDH, Mm99999915\_g1. The Ct (cycle threshold) values were used for all experiments and were first  
5 normalized to endogenous control levels by calculating the  $\Delta Ct$  for each sample. Values were then analyzed relative to control, to generate a  $\Delta\Delta Ct$  value. Fold change was obtained using the equation, expression fold change =  $2^{-\Delta\Delta Ct}$ . Each experiment was repeated three times independently.

### **Immunofluorescence**

10 Cultured cells on polyornithine-coated coverslips were pre-extracted with PHEM buffer (60mM PIPES, 25mM HEPES, 10mM EGTA and 2mM MgCl<sub>2</sub>, pH 6.8) containing 0.025% saponin for 20min, then washed twice for 20min with PHEM buffer containing 0.025% saponin and 8% sucrose. The cells were fixed with a solution of  
15 4% paraformaldehyde (Electron Microscopy Sciences) and 8% sucrose in PBS for 30min at room temperature, and blocked with a solution of 1% BSA and 0.025% saponin in PBS for 1hour. Cells were stained for primary antibodies and Alexa Fluor-conjugated secondary antibodies, DAPI-stained, and mounted onto slides using Dako fluorescent mounting medium and were imaged using a LSM 700 Confocal microscope (Zeiss). Expression of empty GFP vector and NHE6-GFP was detected  
20 using the GFP fluorescence. Fractional colocalization was determined from the Pearson's correlation coefficient, using the JACoP ImageJ plugin that measures the direct overlap of pixels in the confocal section, and represented it as mean  $\pm$  S.E.

### **Western blot and surface biotinylation**

Cells were lysed using 1% Nonidet P-40 (Sigma) supplemented with protease inhibitor  
25 cocktail (Roche). Cells were sonicated and then centrifuged for 15min at 14,000 rpm at 4°C. Protein concentration was determined using the BCA assay. Surface biotinylation was performed using Pierce Cell Surface Protein Isolation Kit (#89881, Thermo Fisher Scientific), as per manufacturer's instructions. Equal amounts of total protein or cell

surface protein were separated by polyacrylamide gel (NuPAGE Novex) under reducing conditions and then electrophoretically transferred onto nitrocellulose membranes (Bio-Rad). Ponceau stain or GelCode blue stain (#24590, Thermo Fisher Scientific) was used to confirm protein transfer. Next, the membranes were treated with the blocking  
5 buffer containing 5% milk, followed by overnight incubation with primary antibodies and one hour incubation with HRP-conjugated secondary antibodies (GE Healthcare). SuperSignal West Pico substrate was used for detection. Amersham Imager 600 system was used to capture images and densitometric quantification was done using ImageJ software.

## 10 **Endosomal pH measurement**

Endosomal pH was measured using flow cytometry, as we previously described<sup>28, 43</sup>. Briefly, cells were rinsed and incubated in serum-free medium for 30min, to remove residual transferrin and then incubated with pH-sensitive FITC-Transferrin (#T2871, Thermo Fisher Scientific) (75 µg/ml) together with pH non-sensitive Alexafluor 633-  
15 Transferrin (#T23362, Thermo Fisher Scientific) (25 µg/ml) at 37°C for 55min. For experiments with GFP tagged NHE6 (wild type and mutants), we used pH-sensitive pHrodo Red-Transferrin (#P35376, Thermo Fisher Scientific), to avoid spectral overlap. Transferrin uptake was stopped by placing the cells on ice. Excess transferrin was removed by washing with ice-cold serum-free DMEM and PBS, whereas bound  
20 transferrin was removed by washing with ice-cold pH 5.0 PBS and pH 7.0 PBS. Cells were trypsinized and pH was determined by flow cytometry analysis of ~10,000 cells in biological triplicates using the FACS Aria instrument (BD Biosciences). A four-point calibration curve with different pH values (4.5, 5.5, 6.5 and 7.5) was generated using Intracellular pH Calibration Buffer Kit (#P35379, Thermo Fisher Scientific) in the  
25 presence of 10µM K<sup>+</sup>/H<sup>+</sup> ionophore nigericin and 10µM K<sup>+</sup> ionophore valinomycin.

## **Lysosomal pH measurement**

Lysosomal pH was measured as previously described, with modifications<sup>25</sup>. Briefly, cells were rinsed and incubated with pH-sensitive pHrodo-green-Dextran (#P35368, Thermo

Fisher Scientific) (5  $\mu\text{g/ml}$ ) together with pH non-sensitive Alexa Fluor 647-Dextran (#D22914, Thermo Fisher Scientific) (10  $\mu\text{g/ml}$ ) for 12 hours, washed then chased in dye free media for additional 6 hours. Cells were trypsinized and pH was determined by flow cytometry analysis of  $\sim 10,000$  cells in biological triplicates using the FACS Aria instrument (BD Biosciences). A four-point calibration curve with different pH values (3.5, 4.5, 5.5 and 6.5) was generated in the presence of  $10\mu\text{M K}^+/\text{H}^+$  ionophore nigericin and  $10\mu\text{M K}^+$  ionophore valinomycin.

### Cytoplasmic pH measurement

Cytoplasmic pH was measured using flow cytometry as we previously described<sup>29</sup>. Briefly, cells were washed and incubated with  $1\mu\text{M BCECF-AM}$  (Thermo Fisher Scientific) for 30min. Cells were trypsinized and pH was determined using flow cytometry analysis of  $\sim 10,000$  cells in biological triplicates using the FACS Aria instrument (BD Biosciences) by excitation at 488nm and emissions filtered through 530 ( $\pm 15$ ) nm (pH-sensitive green fluorescence) and 616 ( $\pm 12$ ) nm (pH non-sensitive red fluorescence) filters. A pH calibration curve was generated by preloading cells with  $1\mu\text{M BCECF-AM}$  for 30min followed by incubation in a 'high  $\text{K}^+$ ' HEPES buffer (25mM HEPES, 145mM KCl, 0.8mM  $\text{MgCl}_2$ , 1.8mM  $\text{CaCl}_2$ , 5.5mM glucose) with pH adjusted to different values (6.6, 7.0, 7.4 and 7.8), and used to prepare a four-point calibration curve in the presence of  $10\mu\text{M K}^+/\text{H}^+$  ionophore nigericin.

### Baculovirus Transduction

For subcellular localization of endocytosed  $\text{A}\beta$ , we used CellLight-Bacmam 2.0 transduction technology (Molecular probes). Culture medium from ApoE3 astrocyte culture was aspirated, and fresh medium containing CellLight RFP-Bacmam 2.0 reagent targeting early endosome (#C10587, Rab5) or late endosome (#C10589, Rab7), or lysosome (#C10504, Lamp1) was added to reach a final concentration of 30 particles per cell, as suggested by the manufacturer's instructions. Four hours after transduction  $100\text{ nM}$  fluorescently-labeled HiLyte Fluor 647- $\text{A}\beta 40$  (#AS-64161, AnaSpec) was added to the media and cultured for an additional 12 hours. Cells were fixed with a solution of

4% paraformaldehyde, DAPI-stained, and mounted onto slides to determine subcellular localization of A $\beta$  by confocal imaging.

### **LRP1 surface labeling**

LRP1 surface labeling was performed by immunofluorescence and flow cytometry using  
5 a mouse monoclonal antibody against an extracellular epitope of LRP1 (#ab20753, Abcam). For immunofluorescence, live cells were incubated with primary antibody on ice for 1 hour. Cells were then fixed, incubated with secondary antibody, DAPI stained and mounted onto slides to quantify surface LRP1 levels by confocal microscopy. For  
10 flow cytometry, live cells were trypsinized and incubated with primary antibody for 30 minutes on ice. Cells were then washed, incubated with secondary antibody, and subjected to flow cytometry analysis of ~5,000 cells in biological triplicates.

### **A $\beta$ surface-binding assay**

Ligand surface-binding assay was performed as we previously described, with  
15 modifications<sup>29</sup>. Cells on coverslips were rinsed and incubated in serum-free medium for 30min and then exposed to 100 nM fluorescently-labeled HiLyte Fluor 647-A $\beta$ 40 (#AS-64161, AnaSpec) in 1% BSA solution on ice for 10min, followed by subsequent washes with PBS at pH 7.0. Cells were then fixed, DAPI stained and mounted onto slides to quantify A $\beta$  surface-binding by confocal microscopy.

### **HDAC nuclear translocation**

20 For quantifying HDAC4 nuclear translation, we immunostained cells using a mouse monoclonal antibody against HDAC4 (#5392, Cell Signaling Technology) and confocal microscopy images were analyzed to measure colocalization between HDAC4 and nuclear stain DAPI. Next, we performed nuclear fractionation of cultured cells using Nuclei isolation kit (#NUC-101, Sigma), as per manufacturer's instructions. Protein  
25 concentration was determined using the BCA assay. Protein from nuclear lysate was resolved using SDS-PAGE and transferred to nitrocellulose membranes. The

membranes were then probed with anti-HDAC4 antibody to detect HDAC4 in the nuclear fraction.
